# Supplementary material for: Effect of Aerobic and Anaerobic Exercise on the Complement System of Proteins in Healthy Young Males
Source: J Clin Med. 2020 Jul 23;9(8):2357. doi: 10.3390/jcm9082357 (PMC7464301; doi:10.3390/jcm9082357)
Supplement: Supplementary file 1 [file jcm-09-02357-s001.zip › jcm-856170_Table-S1.xlsx]

## Sheet: raw data
test	age group	time point	HCT (%)	Hb (mmol/l)	DeltaPV(%)	C3 (mg/dl)	Ratio C3	Delta C3	corr. C3 (mg/dL)	corr. Ratio C3	corr. DeltaC3	C4 (mg/dl)	Ratio C4	Delta C4	corr. C4 (mg/dl)	corr. Ratio C4	corr. Delta C4	albumin (g/L)	Ratio albumin	Delta albumin	corr. albumin (g/L)	corr. Ratio albumin	corr. Delta albumin	total protein (g/L)	Ratio total protein	Delta total protein	corr. total protein (g/L)	corr. Ratio total protein	corr. Delta total protein	CRP (mg/L)	Ratio CRP	Delta CRP	corr. CRP (mg/L)	corr. Ratio CRP	corr. Delta CRP	LA (mmol/L)	Ratio LA	Delta LA	corr. LA (mmol/L)	corr. Ratio LA	corr. Delta LA	C2 (ng/mL)	Ratio C2	Delta C2	corr. C2 (ng/mL)	corr. Ratio C2	corr. Delta C2	C3a (ng/mL)	Ratio C3a
Beep	1	pre-test	45.3	14.5		154.56	1	0	154.56	1	0	0.25	1	0	0.25	1	0	46.7	1	0	46.7	1	0	63.98	1	0	63.98	1	0	0.7	1	0	0.7	1	0	2.9	1	0	2.9	1	0	9.875	1	0	9.875	1	0	0.256	1
Beep	1	post-test	47	15.15	-7.26495	127.25	0.823305	-27.31	118.005	0.763492	-36.5546	1.43	5.72	1.18	1.32611	5.30444	1.07611	47	1.00642	0.3	43.5855	0.933308	-3.11453	66.47	1.03892	2.49	61.641	0.963442	-2.33901	1	1.42857	0.3	0.927351	1.32479	0.227351	8.4	2.89655	5.5	7.78974	2.68612	4.88974	6.587	0.667038	-3.288	6.10846	0.618578	-3.76654	0.487	1.90234
Beep	1	recovery	47.7	15.95	-13.0796	136.51	0.883217	-18.05	118.655	0.767696	-35.905	1.45	5.8	1.2	1.26035	5.04138	1.01035	47.5	1.01713	0.8	41.2872	0.884094	-5.41281	66.47	1.03892	2.49	57.776	0.903032	-6.20402	1.2	1.71429	0.5	1.04304	1.49006	0.343045	2.7	0.931034	-0.2	2.34685	0.809259	-0.553149	12.358	1.25144	2.483	10.7416	1.08776	0.866622	0.478	1.86719
Beep	1	pre-test	45.5	14.66		124.9	1	0	124.9	1	0	6.86	1	0	6.86	1	0	51.9	1	0	51.9	1	0	69.89	1	0	69.89	1	0	0.1	1	0	0.1	1	0	3.1	1	0	3.1	1	0	10.254	1	0	10.254	1	0	0.364	1
Beep	1	post-test	46	14.98	-3.03401	60.2	0.481986	-64.7	58.3735	0.467362	-66.5265	7.72	1.12536	0.86	7.48577	1.09122	0.625774	53.8	1.03661	1.9	52.1677	1.00516	0.2677	73.24	1.04793	3.35	71.0179	1.01614	1.12789	0.7	7	0.6	0.678762	6.78762	0.578762	8.6	2.77419	5.5	8.33907	2.69002	5.23907	9.875	0.963039	-0.379	9.57539	0.93382	-0.678609	0.578	1.58791
Beep	1	recovery	43.4	14.82	2.73199	130.45	1.04444	5.55	134.014	1.07297	9.11388	15.34	2.23615	8.48	15.7591	2.29724	8.89909	50.7	0.976879	-1.2	52.0851	1.00357	0.185118	68.29	0.977107	-1.6	70.1557	1.0038	0.265675	0	0	-0.1	0	0	-0.1	3.1	1	0	3.18469	1.02732	0.0846917	11.236	1.09577	0.982	11.543	1.1257	1.28897	0.654	1.7967
Beep	1	pre-test	48.2	15.63		144.81	1	0	144.81	1	0	6.57	1	0	6.57	1	0	49.5	1	0	49.5	1	0	66.34	1	0	66.34	1	0	0.1	1	0	0.1	1	0	2.9	1	0	2.9	1	0	8.759	1	0	8.759	1	0	0.267	1
Beep	1	post-test	51.9	16.92	-14.2224	129.79	0.896278	-15.02	111.331	0.768806	-33.4792	12.95	1.97108	6.38	11.1082	1.69075	4.5382	53.6	1.08283	4.1	45.9768	0.928824	-3.5232	73.72	1.11125	7.38	63.2353	0.953199	-3.10475	0.9	9	0.8	0.771998	7.71998	0.671998	9.4	3.24138	6.5	8.0631	2.78038	5.1631	9.875	1.12741	1.116	8.47054	0.967067	-0.288461	0.345	1.29213
Beep	1	recovery	42	14.5	20.695	129.88	0.896899	-14.93	156.759	1.08251	11.9486	6.43	0.978691	-0.14	7.76069	1.18123	1.19069	51.7	1.04444	2.2	62.3993	1.26059	12.8993	69.88	1.05336	3.54	84.3417	1.27135	18.0017	1.6	16	1.5	1.93112	19.3112	1.83112	3.6	1.24138	0.7	4.34502	1.49828	1.44502	12.365	1.41169	3.606	14.9239	1.70384	6.16493	0.332	1.24345
Beep	2	pre-test	49.4	16.11		191.06	1	0	191.06	1	0	8.93	1	0	8.93	1	0	47.6	1	0	47.6	1	0	68.86	1	0	68.86	1	0	1.4	1	0	1.4	1	0	3	1	0	3	1	0	10.587	1	0	10.587	1	0	0.267	1
Beep	2	post-test	49.4	16.27	-0.983405	64.98	0.340103	-126.08	64.341	0.336758	-126.719	9.83	1.10078	0.9	9.73333	1.08996	0.803331	52.2	1.09664	4.6	51.6867	1.08585	4.08666	76.98	1.11792	8.12	76.223	1.10693	7.36297	1.7	1.21429	0.3	1.68328	1.20234	0.283282	13.2	4.4	10.2	13.0702	4.35673	10.0702	8.698	0.821574	-1.889	8.61246	0.813494	-1.97454	0.365	1.36704
Beep	2	recovery	48.2	15.95	3.39847	125.47	0.656705	-65.59	129.734	0.679023	-61.3259	15.58	1.74468	6.65	16.1095	1.80397	7.17948	48.4	1.01681	0.8	50.0449	1.05136	2.44486	72.42	1.0517	3.56	74.8812	1.08744	6.02117	2.2	1.57143	0.8	2.27477	1.62483	0.874766	4.1	1.36667	1.1	4.23934	1.41311	1.23934	12.364	1.16785	1.777	12.7842	1.20754	2.19719	0.458	1.71536
Beep	2	pre-test	46.2	14.98		194.14	1	0	194.14	1	0	4.28	1	0	4.28	1	0	47.5	1	0	47.5	1	0	67.6	1	0	67.6	1	0	0.1	1	0	0.1	1	0	3.9	1	0	3.9	1	0	12.654	1	0	12.654	1	0	0.211	1
Beep	2	post-test	47.4	15.63	-6.29639	86.06	0.443288	-108.08	80.6413	0.415377	-113.499	6.83	1.59579	2.55	6.39996	1.49532	2.11996	49.4	1.04	1.9	46.2896	0.974518	-1.21042	71.76	1.06154	4.16	67.2417	0.9947	-0.358292	0.6	6	0.5	0.562222	5.62222	0.462222	12.5	3.20513	8.6	11.713	3.00332	7.81295	10.264	0.811127	-2.39	9.61774	0.760055	-3.03626	0.456	2.16114
Beep	2	recovery	44	14.66	6.36129	87.91	0.452818	-106.23	93.5022	0.481623	-100.638	4.47	1.04439	0.19	4.75435	1.11083	0.47435	48.4	1.01895	0.9	51.4789	1.08377	3.97886	68.2	1.00888	0.6	72.5384	1.07305	4.9384	1.3	13	1.2	1.3827	13.827	1.2827	3.5	0.897436	-0.4	3.72265	0.954524	-0.177355	12.654	1	0	13.459	1.06361	0.804958	0.21	0.995261
Beep	2	pre-test	46.9	15.47		217.18	1	0	217.18	1	0	2.02	1	0	2.02	1	0	48.7	1	0	48.7	1	0	73.74	1	0	73.74	1	0	0.1	1	0	0.1	1	0	3.2	1	0	3.2	1	0	14.287	1	0	14.287	1	0	0.26	1
Beep	2	post-test	48.5	16.11	-6.86617	52.78	0.243024	-164.4	49.156	0.226338	-168.024	9.45	4.67822	7.43	8.80115	4.357	6.78115	49.2	1.01027	0.5	45.8218	0.9409	-2.87815	72.42	0.982099	-1.32	67.4475	0.914667	-6.29248	0.9	9	0.8	0.838205	8.38205	0.738205	5.8	1.8125	2.6	5.40176	1.68805	2.20176	14.56	1.01911	0.273	13.5603	0.949135	-0.726714	0.47	1.80769
Beep	2	recovery	48.2	16.11	-6.32364	89.38	0.411548	-127.8	83.7279	0.385523	-133.452	9.24	4.57426	7.22	8.6557	4.285	6.6357	47.6	0.977413	-1.1	44.5899	0.915605	-4.11005	71.44	0.968809	-2.3	66.9224	0.907545	-6.81761	1.5	15	1.4	1.40515	14.0515	1.30515	3.1	0.96875	-0.1	2.90397	0.90749	-0.296033	15.27	1.0688	0.983	14.3044	1.00122	0.0173803	0.18	0.692308
Beep	1	pre-test	44.8	14.98		160.51	1	0	160.51	1	0	9.55	1	0	9.55	1	0	46.1	1	0	46.1	1	0	64.39	1	0	64.39	1	0	0.4	1	0	0.4	1	0	2.8	1	0	2.8	1	0	8.69	1	0	8.69	1	0	0.28	1
Beep	1	post-test	47	15.47	-7.02669	48.39	0.301477	-112.12	44.9898	0.280293	-115.52	17.57	1.83979	8.02	16.3354	1.71051	6.78541	47.7	1.03471	1.6	44.3483	0.962001	-1.75173	67.35	1.04597	2.96	62.6175	0.972473	-1.77248	0.3	0.75	-0.1	0.27892	0.6973	-0.12108	11.8	4.21429	9	10.9709	3.91816	8.17085	9.654	1.11093	0.964	8.97564	1.03287	0.285643	0.46	1.64286
Beep	1	recovery	46.8	15.63	-7.63118	142.38	0.887048	-18.13	131.515	0.819355	-28.9953	15.39	1.61152	5.84	14.2156	1.48854	4.66556	48.2	1.04555	2.1	44.5218	0.965765	-1.57823	65.94	1.02407	1.55	60.908	0.945923	-3.482	1	2.5	0.6	0.923688	2.30922	0.523688	3.2	1.14286	0.4	2.9558	1.05564	0.155802	10.23	1.17722	1.54	9.44933	1.08738	0.75933	0.18	0.642857
Beep	1	pre-test	45.5	15.15		169.55	1	0	169.55	1	0	9.64	1	0	9.64	1	0	44.9	1	0	44.9	1	0	63.22	1	0	63.22	1	0	0.6	1	0	0.6	1	0	2.6	1	0	2.6	1	0	10.25	1	0	10.25	1	0	0.365	1
Beep	1	post-test	48.9	16.11	-11.8258	90.28	0.532468	-79.27	79.6037	0.4695	-89.9463	8.5	0.881743	-1.14	7.49481	0.77747	-2.14519	48	1.06904	3.1	42.3236	0.942619	-2.57639	67.28	1.06422	4.06	59.3236	0.938368	-3.8964	1	1.66667	0.4	0.881742	1.46957	0.281742	7.5	2.88462	4.9	6.61306	2.54349	4.01306	11.26	1.09854	1.01	9.92841	0.968626	-0.321586	0.458	1.25479
Beep	1	recovery	44.2	15.31	1.31532	237.27	1.39941	67.72	240.391	1.41782	70.8409	8.69	0.901452	-0.95	8.8043	0.913309	-0.835698	45.9	1.02227	1	46.5037	1.03572	1.60373	64.04	1.01297	0.82	64.8823	1.02629	1.66233	0.5	0.833333	-0.1	0.506577	0.844294	-0.0934234	2.2	0.846154	-0.4	2.22894	0.857284	-0.371063	11.36	1.10829	1.11	11.5094	1.12287	1.25942	0.215	0.589041
Beep	1	pre-test	49	16.27		151.78	1	0	151.78	1	0	9.17	1	0	9.17	1	0	44.4	1	0	44.4	1	0	61.35	1	0	61.35	1	0	0.7	1	0	0.7	1	0	2.9	1	0	2.9	1	0	9.658	1	0	9.658	1	0	0.442	1
Beep	1	post-test	50.3	16.92	-6.2927	55.16	0.363421	-96.62	51.6889	0.340552	-100.091	10.66	1.16249	1.49	9.9892	1.08933	0.819198	50.6	1.13964	6.2	47.4159	1.06793	3.01589	70.62	1.1511	9.27	66.1761	1.07866	4.82609	0.8	1.14286	0.1	0.749658	1.07094	0.0496584	10.6	3.65517	7.7	9.93297	3.42516	7.03297	10.268	1.06316	0.61	9.62187	0.996259	-0.0361348	0.687	1.5543
Beep	1	recovery	45.9	15.79	9.30311	47.06	0.310054	-104.72	51.438	0.338899	-100.342	3.86	0.420938	-5.31	4.2191	0.460098	-4.9509	44.9	1.01126	0.5	49.0771	1.10534	4.6771	60.61	0.987938	-0.74	66.2486	1.07985	4.89861	0.8	1.14286	0.1	0.874425	1.24918	0.174425	2.7	0.931034	-0.2	2.95118	1.01765	0.0511839	8.654	0.896045	-1.004	9.45909	0.979405	-0.198909	0.456	1.03167
Beep	1	pre-test	39.7	13.37		194.56	1	0	194.56	1	0	1.93	1	0	1.93	1	0	45.4	1	0	45.4	1	0	64.79	1	0	64.79	1	0	2.1	1	0	2.1	1	0	2.8	1	0	2.8	1	0	10.298	1	0	10.298	1	0	0.456	1
Beep	1	post-test	43.1	14.18	-11.0287	96.64	0.496711	-97.92	85.9819	0.44193	-108.578	19.86	10.2902	17.93	17.6697	9.15529	15.7397	46.6	1.02643	1.2	41.4606	0.91323	-3.93936	66.68	1.02917	1.89	59.3261	0.915667	-5.46391	3.2	1.52381	1.1	2.84708	1.35575	0.747083	7.7	2.75	4.9	6.85079	2.44671	4.05079	9.654	0.937464	-0.644	8.58929	0.834074	-1.70871	0.569	1.24781
Beep	1	recovery	39.2	13.37	0.829187	92.15	0.473633	-102.41	92.9141	0.47756	-101.646	15.33	7.94301	13.4	15.4571	8.00887	13.5271	44.9	0.988987	-0.5	45.2723	0.997187	-0.127695	62.84	0.969903	-1.95	63.3611	0.977945	-1.42894	2.3	1.09524	0.2	2.31907	1.10432	0.219071	2.2	0.785714	-0.6	2.21824	0.792229	-0.581758	10.254	0.995727	-0.044	10.339	1.00398	0.0410249	0.214	0.469298
Beep	1	pre-test	47.3	15.79		209.42	1	0	209.42	1	0	4.49	1	0	4.49	1	0	47.3	1	0	47.3	1	0	64.25	1	0	64.25	1	0	0.8	1	0	0.8	1	0	3.3	1	0	3.3	1	0	8.975	1	0	8.975	1	0	0.358	1
Beep	1	post-test	49.7	16.27	-7.36994	113.17	0.540397	-96.25	104.829	0.50057	-104.591	6.75	1.50334	2.26	6.25253	1.39255	1.76253	52.3	1.10571	5	48.4455	1.02422	1.14552	70.25	1.09339	6	65.0726	1.0128	0.822617	0.5	0.625	-0.3	0.46315	0.578938	-0.33685	12.5	3.78788	9.2	11.5788	3.50871	8.27876	9.654	1.07565	0.679	8.94251	0.99638	-0.032494	0.789	2.20391
Beep	1	recovery	46.5	15.79	1.51803	132.01	0.63036	-77.41	134.014	0.639929	-75.4061	12.73	2.83519	8.24	12.9232	2.87823	8.43324	47	0.993658	-0.3	47.7135	1.00874	0.413472	62.8	0.977432	-1.45	63.7533	0.99227	-0.496679	1.2	1.5	0.4	1.21822	1.52277	0.418216	2.6	0.787879	-0.7	2.63947	0.799839	-0.660531	10.25	1.14206	1.275	10.4056	1.1594	1.4306	0.345	0.963687
Beep	1	pre-test	51.5	16.76		204.35	1	0	204.35	1	0	6.21	1	0	6.21	1	0	46.2	1	0	46.2	1	0	67.11	1	0	67.11	1	0	1	1	0	1	1	0	3	1	0	3	1	0	7.586	1	0	7.586	1	0	0.218	1
Beep	1	post-test	52.8	16.92	-3.60069	70.85	0.346709	-133.5	68.2989	0.334225	-136.051	7.39	1.19002	1.18	7.12391	1.14717	0.913909	51	1.1039	4.8	49.1636	1.06415	2.96365	75.71	1.12815	8.6	72.9839	1.08753	5.87392	1.6	1.6	0.6	1.54239	1.54239	0.542389	14.5	4.83333	11.5	13.9779	4.6593	10.9779	9.654	1.27261	2.068	9.30639	1.22678	1.72039	0.654	3
Beep	1	recovery	48.4	15.95	11.7947	61.22	0.299584	-143.13	68.4407	0.334919	-135.909	6.2	0.99839	-0.01	6.93127	1.11615	0.721273	46.3	1.00216	0.1	51.761	1.12037	5.56096	66.59	0.992252	-0.52	74.4441	1.10928	7.3341	2.1	2.1	1.1	2.34769	2.34769	1.34769	3.5	1.16667	0.5	3.91282	1.30427	0.912815	11.25	1.48299	3.664	12.5769	1.65791	4.99091	0.215	0.986239
Beep	1	pre-test	46.3	15.63		167.77	1	0	167.77	1	0	1.29	1	0	1.29	1	0	46.1	1	0	46.1	1	0	68.62	1	0	68.62	1	0	1.5	1	0	1.5	1	0	3.2	1	0	3.2	1	0	6.587	1	0	6.587	1	0	0.302	1
Beep	1	post-test	49.3	16.43	-10.1837	65.1	0.388031	-102.67	58.4704	0.348515	-109.3	6.34	4.91473	5.05	5.69435	4.41423	4.40435	51.3	1.1128	5.2	46.0758	0.999474	-0.0242457	77.96	1.13611	9.34	70.0208	1.02041	1.40078	1.5	1	0	1.34724	0.898163	-0.152756	10.8	3.375	7.6	9.70016	3.0313	6.50016	9.587	1.45544	3	8.61069	1.30722	2.02369	0.458	1.51656
Beep	1	recovery	44.2	14.98	8.41942	65.05	0.387733	-102.72	70.5268	0.420378	-97.2432	5.12	3.96899	3.83	5.55107	4.30316	4.26107	46.1	1	0	49.9814	1.08419	3.88135	67.66	0.98601	-0.96	73.3566	1.06903	4.73658	2.3	1.53333	0.8	2.49365	1.66243	0.993647	3.4	1.0625	0.2	3.68626	1.15196	0.48626	12.35	1.87491	5.763	13.3898	2.03276	6.8028	0.368	1.21854
Beep	1	pre-test	49.8	16.44		138.63	1	0	138.63	1	0	7.1	1	0	7.1	1	0	46.3	1	0	46.3	1	0	63.47	1	0	63.47	1	0	1	1	0	1	1	0	2.6	1	0	2.6	1	0	8.98	1	0	8.98	1	0	0.324	1
Beep	1	post-test	48.7	16.11	4.28454	130.38	0.940489	-8.25	135.966	0.980785	-2.66382	9.79	1.37887	2.69	10.2095	1.43795	3.10946	49.7	1.07343	3.4	51.8294	1.11943	5.52942	68.78	1.08366	5.31	71.7269	1.13009	8.25691	0.8	0.8	-0.2	0.834276	0.834276	-0.165724	11.5	4.42308	8.9	11.9927	4.61259	9.39272	9.87	1.09911	0.89	10.2929	1.1462	1.31288	0.587	1.81173
Beep	1	recovery	44.3	14.82	23.085	96	0.692491	-42.63	118.162	0.852352	-20.4684	5.88	0.828169	-1.22	7.2374	1.01935	0.137397	46.4	1.00216	0.1	57.1114	1.23351	10.8114	64.2	1.0115	0.73	79.0206	1.24501	15.5506	1.4	1.4	0.4	1.72319	1.72319	0.72319	3.9	1.5	1.3	4.80031	1.84627	2.20031	10.23	1.1392	1.25	12.5916	1.40218	3.61159	0.122	0.376543
Beep	2	pre-test	47.3	15.95		219.27	1	0	219.27	1	0	2.99	1	0	2.99	1	0	45.9	1	0	45.9	1	0	66.6	1	0	66.6	1	0	0.5	1	0	0.5	1	0	2.4	1	0	2.4	1	0	9.515	1	0	9.515	1	0	0.317	1
Beep	2	post-test	47.1	15.79	1.39665	128.71	0.586993	-90.56	130.508	0.595191	-88.7624	7.9	2.64214	4.91	8.01034	2.67904	5.02034	46.1	1.00436	0.2	46.7439	1.01838	0.843856	68	1.02102	1.4	68.9497	1.03528	2.34972	1	2	0.5	1.01397	2.02793	0.513967	9.3	3.875	6.9	9.42989	3.92912	7.02989	7.839	0.823857	-1.676	7.94848	0.835363	-1.56652	0.484	1.52681
Beep	2	recovery	45.3	15.31	8.13398	95.09	0.433666	-124.18	102.825	0.468941	-116.445	3.17	1.0602	0.18	3.42785	1.14644	0.437847	44.3	0.965142	-1.6	47.9034	1.04365	2.00336	63.78	0.957658	-2.82	68.9679	1.03555	2.36786	1.6	3.2	1.1	1.73014	3.46029	1.23014	3.1	1.29167	0.7	3.35215	1.39673	0.952154	8.851	0.930215	-0.664	9.57094	1.00588	0.055939	0.338	1.06625
Beep	2	pre-test	43.7	14.02		162.68	1	0	162.68	1	0	11.01	1	0	11.01	1	0	44.6	1	0	44.6	1	0	63.21	1	0	63.21	1	0	3.3	1	0	3.3	1	0	3.4	1	0	3.4	1	0	8.062	1	0	8.062	1	0	0.277	1
Beep	2	post-test	45.5	15.15	-10.4174	127.89	0.786145	-34.79	114.567	0.704248	-48.1129	17.9	1.62579	6.89	16.0353	1.45643	5.02528	48	1.07623	3.4	42.9996	0.964117	-1.60037	68.5	1.08369	5.29	61.3641	0.970797	-1.84594	3.1	0.939394	-0.2	2.77706	0.841533	-0.522941	12.9	3.79412	9.5	11.5562	3.39887	8.15615	9.703	1.20355	1.641	8.6922	1.07817	0.630196	0.383	1.38267
Beep	2	recovery	45.3	14.82	-8.08662	128.12	0.787558	-34.56	117.759	0.723872	-44.9206	17.81	1.61762	6.8	16.3698	1.48681	5.35977	45.2	1.01345	0.6	41.5448	0.931499	-3.05515	63.8	1.00933	0.59	58.6407	0.927713	-4.56926	2.7	0.818182	-0.6	2.48166	0.752019	-0.818339	3.7	1.08824	0.3	3.4008	1.00023	0.000795095	9.816	1.21756	1.754	9.02222	1.1191	0.960217	0.228	0.823105
Beep	2	pre-test	42.1	13.53		208.61	1	0	208.61	1	0	11.45	1	0	11.45	1	0	48.2	1	0	48.2	1	0	67.31	1	0	67.31	1	0	0.7	1	0	0.7	1	0	3.2	1	0	3.2	1	0	9.866	1	0	9.866	1	0	0.186	1
Beep	2	post-test	42.9	14.18	-5.90228	129.55	0.621015	-79.06	121.904	0.584361	-86.7064	15.46	1.35022	4.01	14.5475	1.27052	3.09751	51.8	1.07469	3.6	48.7426	1.01126	0.54262	73.47	1.09152	6.16	69.1336	1.02709	1.8236	0.9	1.28571	0.2	0.846879	1.20983	0.146879	11.6	3.625	8.4	10.9153	3.41104	7.71534	18.322	1.85708	8.456	17.2406	1.74747	7.37458	0.313	1.6828
Beep	2	recovery	40.2	13.21	5.78342	120.19	0.576147	-88.42	127.141	0.609468	-81.4689	15.74	1.37467	4.29	16.6503	1.45418	5.20031	49.1	1.01867	0.9	51.9397	1.07759	3.73966	69.32	1.02986	2.01	73.3291	1.08942	6.01907	1.2	1.71429	0.5	1.2694	1.81343	0.569401	2.7	0.84375	-0.5	2.85615	0.892548	-0.343848	12.621	1.27924	2.755	13.3509	1.35323	3.48493	0.507	2.72581
Beep	2	pre-test	45.8	15.63		186.96	1	0	186.96	1	0	3.06	1	0	3.06	1	0	45.6	1	0	45.6	1	0	66.04	1	0	66.04	1	0	3.2	1	0	3.2	1	0	2.9	1	0	2.9	1	0	8.77	1	0	8.77	1	0	0.207	1
Beep	2	post-test	50.1	16.92	-14.9528	83.3	0.44555	-103.66	70.8443	0.378928	-116.116	5.36	1.75163	2.3	4.55853	1.48972	1.49853	49.9	1.0943	4.3	42.4385	0.93067	-3.16146	72.45	1.09706	6.41	61.6167	0.933021	-4.42332	2.6	0.8125	-0.6	2.21123	0.691008	-0.988774	12.2	4.2069	9.3	10.3758	3.57785	7.47576	11.088	1.26431	2.318	9.43003	1.07526	0.66003	0.576	2.78261
Beep	2	recovery	46.1	15.63	-0.553506	72.78	0.389281	-114.18	72.3772	0.387126	-114.583	4.18	1.36601	1.12	4.15686	1.35845	1.09686	44.2	0.969298	-1.4	43.9554	0.963933	-1.64465	63.7	0.964567	-2.34	63.3474	0.959228	-2.69258	3.2	1	0	3.18229	0.994465	-0.0177122	2.2	0.758621	-0.7	2.18782	0.754422	-0.712177	11.111	1.26693	2.341	11.0495	1.25992	2.2795	0.352	1.70048
Beep	2	pre-test	46.2	15.15		187.48	1	0	187.48	1	0	2.19	1	0	2.19	1	0	46.1	1	0	46.1	1	0	61.51	1	0	61.51	1	0	0.8	1	0	0.8	1	0	3.9	1	0	3.9	1	0	10.027	1	0	10.027	1	0	0.094	1
Beep	2	post-test	51.1	16.76	-17.8391	81.08	0.432473	-106.4	66.6161	0.355324	-120.864	12.92	5.89954	10.73	10.6152	4.84712	8.42519	46.8	1.01518	0.7	38.4513	0.834085	-7.6487	62.65	1.01853	1.14	51.4738	0.836836	-10.0362	0.4	0.5	-0.4	0.328644	0.410805	-0.471356	10.4	2.66667	6.5	8.54473	2.19096	4.64473	9.334	0.930887	-0.693	7.6689	0.764825	-2.3581	0.361	3.84043
Beep	2	recovery	44.3	14.98	4.70652	99.22	0.52923	-88.26	103.89	0.554138	-83.5902	10.49	4.78995	8.3	10.9837	5.01539	8.79371	45.6	0.989154	-0.5	47.7462	1.03571	1.64617	60.43	0.982442	-1.08	63.2742	1.02868	1.76415	1.9	2.375	1.1	1.98942	2.48678	1.18942	2.4	0.615385	-1.5	2.51296	0.644348	-1.38704	11.675	1.16436	1.648	12.2245	1.21916	2.19749	0.354	3.76596
Beep	2	pre-test	48.1	16.11		191.29	1	0	191.29	1	0	3.6	1	0	3.6	1	0	48.1	1	0	48.1	1	0	63.18	1	0	63.18	1	0	2.2	1	0	2.2	1	0	3.6	1	0	3.6	1	0	7.407	1	0	7.407	1	0	0.686	1
Beep	2	post-test	50.3	16.92	-8.82323	157.43	0.822991	-33.86	143.54	0.750377	-47.7504	6.58	1.82778	2.98	5.99943	1.66651	2.39943	49.8	1.03534	1.7	45.406	0.943992	-2.69397	66.87	1.0584	3.69	60.9699	0.965019	-2.21009	1.9	0.863636	-0.3	1.73236	0.787436	-0.467641	10	2.77778	6.4	9.11768	2.53269	5.51768	8.435	1.13879	1.028	7.69076	1.03831	0.283761	0.806	1.17493
Beep	2	recovery	46	15.79	6.15484	122.25	0.639082	-69.04	129.774	0.678417	-61.5157	5.89	1.63611	2.29	6.25252	1.73681	2.65252	47.4	0.985447	-0.7	50.3174	1.0461	2.2174	63.56	1.00601	0.38	67.472	1.06793	4.29202	1.8	0.818182	-0.4	1.91079	0.86854	-0.289213	2.1	0.583333	-1.5	2.22925	0.619237	-1.37075	10.955	1.47901	3.548	11.6293	1.57004	4.22226	0.417	0.607872
Beep	2	pre-test	41.4	14.18		220.1	1	0	220.1	1	0	8	1	0	8	1	0	50	1	0	50	1	0	71	1	0	71	1	0	0.9	1	0	0.9	1	0	3.2	1	0	3.2	1	0	7.775	1	0	7.775	1	0	0.194	1
Beep	2	post-test	43.4	14.66	-6.57544	129.3	0.58746	-90.8	120.798	0.548832	-99.302	9.04	1.13	1.04	8.44558	1.0557	0.445581	50.2	1.004	0.2	46.8991	0.937983	-3.10087	71.57	1.00803	0.57	66.864	0.941746	-4.13604	1.4	1.55556	0.5	1.30794	1.45327	0.407944	9.4	2.9375	6.2	8.78191	2.74435	5.58191	8.613	1.10778	0.838	8.04666	1.03494	0.271658	0.439	2.26289
Beep	2	recovery	41.4	14.02	1.14123	113.15	0.514085	-106.95	114.441	0.519951	-105.659	10.03	1.25375	2.03	10.1445	1.26806	2.14447	48.6	0.972	-1.4	49.1546	0.983093	-0.845364	68.71	0.967746	-2.29	69.4941	0.978791	-1.50586	2.3	2.55556	1.4	2.32625	2.58472	1.42625	2.5	0.78125	-0.7	2.52853	0.790166	-0.671469	8.755	1.12605	0.98	8.85491	1.1389	1.07991	0.368	1.89691
Beep	2	pre-test	44.5	14.82		202.2	1	0	202.2	1	0	2.97	1	0	2.97	1	0	46.3	1	0	46.3	1	0	65.22	1	0	65.22	1	0	1.6	1	0	1.6	1	0	2.9	1	0	2.9	1	0	7.234	1	0	7.234	1	0	0.235	1
Beep	2	post-test	44.6	14.98	-1.24635	137.12	0.67814	-65.08	135.411	0.669688	-66.789	5.69	1.91582	2.72	5.61908	1.89195	2.64908	48.1	1.03888	1.8	47.5005	1.02593	1.20051	67.39	1.03327	2.17	66.5501	1.02039	1.33009	1.2	0.75	-0.4	1.18504	0.740652	-0.414956	11.7	4.03448	8.8	11.5542	3.9842	8.65418	8.508	1.17611	1.274	8.40196	1.16145	1.16796	0.357	1.51915
Beep	2	recovery	44.5	14.98	-1.06809	108.26	0.53541	-93.94	107.104	0.529692	-95.0963	7.25	2.44108	4.28	7.17256	2.415	4.20256	45.3	0.978402	-1	44.8162	0.967952	-1.48385	62.96	0.965348	-2.26	62.2875	0.955037	-2.93247	2	1.25	0.4	1.97864	1.23665	0.378638	2.6	0.896552	-0.3	2.57223	0.886976	-0.32777	10.415	1.43973	3.181	10.3038	1.42435	3.06976	0.287	1.22128
Beep	1	pre-test	43.5	14.66		187.19	1	0	187.19	1	0	4.54	1	0	4.54	1	0	46.9	1	0	46.9	1	0	65.02	1	0	65.02	1	0	1.4	1	0	1.4	1	0	3.7	1	0	3.7	1	0	10.25	1	0	10.25	1	0	0.087	1
Beep	1	post-test	45.8	15.47	-9.09359	98.27	0.524975	-88.92	89.3337	0.477236	-97.8563	7.73	1.70264	3.19	7.02707	1.54781	2.48707	51.5	1.09808	4.6	46.8168	0.998226	-0.0832001	74.27	1.14226	9.25	67.5162	1.03839	2.49619	0.9	0.642857	-0.5	0.818158	0.584398	-0.581842	11.5	3.10811	7.8	10.4542	2.82547	6.75424	13.245	1.2922	2.995	12.0406	1.17469	1.79055	0.121	1.3908
Beep	1	recovery	43.7	14.82	-1.42978	93.22	0.497997	-93.97	91.8872	0.490876	-95.3028	3.78	0.832599	-0.76	3.72595	0.820695	-0.814046	48.2	1.02772	1.3	47.5108	1.01302	0.610845	67.49	1.03799	2.47	66.525	1.02315	1.50504	1.6	1.14286	0.2	1.57712	1.12652	0.177123	2.7	0.72973	-1	2.6614	0.719296	-1.0386	14.204	1.38576	3.954	14.0009	1.36594	3.75091	0.5	5.74713
Beep	1	pre-test	47.1	15.79		215.95	1	0	215.95	1	0	5.19	1	0	5.19	1	0	47	1	0	47	1	0	67.32	1	0	67.32	1	0	1.4	1	0	1.4	1	0	3.2	1	0	3.2	1	0	8.877	1	0	8.877	1	0	0.506	1
Beep	1	post-test	47.4	15.79	-0.567108	115.14	0.533179	-100.81	114.487	0.530155	-101.463	6.71	1.29287	1.52	6.67195	1.28554	1.48195	48.8	1.0383	1.8	48.5233	1.03241	1.52325	70.62	1.04902	3.3	70.2195	1.04307	2.89951	0.9	0.642857	-0.5	0.894896	0.639211	-0.505104	10	3.125	6.8	9.94329	3.10728	6.74329	10.481	1.18069	1.604	10.4216	1.174	1.54456	0.562	1.11067
Beep	1	recovery	45	15.15	8.36188	98.08	0.454179	-117.87	106.281	0.492157	-109.669	5.69	1.09634	0.5	6.16579	1.18801	0.975791	48.8	1.0383	1.8	52.8806	1.12512	5.8806	70.04	1.0404	2.72	75.8967	1.1274	8.57666	1.2	0.857143	-0.2	1.30034	0.928816	-0.0996575	2.4	0.75	-0.8	2.60069	0.812714	-0.599315	9.333	1.05137	0.456	10.1134	1.13928	1.23641	0.429	0.847826
Beep	2	pre-test	49.1	15.95		190.57	1	0	190.57	1	0	2.64	1	0	2.64	1	0	47.8	1	0	47.8	1	0	66.66	1	0	66.66	1	0	1.9	1	0	1.9	1	0	2.8	1	0	2.8	1	0	9.62	1	0	9.62	1	0	0.178	1
Beep	2	post-test	51.3	16.76	-8.94625	93.76	0.491998	-96.81	85.372	0.447982	-105.198	10.29	3.89773	7.65	9.36943	3.54903	6.72943	49.9	1.04393	2.1	45.4358	0.95054	-2.36418	71.59	1.07396	4.93	65.1854	0.977879	-1.47462	1.3	0.684211	-0.6	1.1837	0.622999	-0.716301	10.8	3.85714	8	9.83381	3.51207	7.03381	8.318	0.864657	-1.302	7.57385	0.787303	-2.04615	0.233	1.30899
Beep	2	recovery	47.7	15.63	4.85415	114.24	0.599465	-76.33	119.785	0.628564	-70.7846	9.78	3.70455	7.14	10.2547	3.88437	7.61474	46.8	0.979079	-1	49.0717	1.02661	1.27174	66.07	0.991149	-0.59	69.2771	1.03926	2.61714	1.4	0.736842	-0.5	1.46796	0.77261	-0.432042	2.5	0.892857	-0.3	2.62135	0.936198	-0.178646	9.049	0.940644	-0.571	9.48825	0.986305	-0.131748	0.379	2.12921
Beep	1	pre-test	44	14.5		66.72	1	0	66.72	1	0	13.8	1	0	13.8	1	0	51.6	1	0	51.6	1	0	70.27	1	0	70.27	1	0	2.8	1	0	2.8	1	0	3.9	1	0	3.9	1	0	7.085	1	0	7.085	1	0	0.139	1
Beep	1	post-test	45.3	14.98	-5.45132	66.99	1.00405	0.27	63.3382	0.949313	-3.38184	20.95	1.51812	7.15	19.8079	1.43536	6.00795	48.9	0.947674	-2.7	46.2343	0.896014	-5.36569	66.6	0.947773	-3.67	62.9694	0.896107	-7.30058	0.7	0.25	-2.1	0.661841	0.236372	-2.13816	14.5	3.71795	10.6	13.7096	3.51527	9.80956	7.486	1.0566	0.401	7.07791	0.999	-0.00708552	0.271	1.94964
Beep	1	recovery	44	14.34	1.11576	73.97	1.10866	7.25	74.7953	1.12103	8.07533	13.6	0.985507	-0.2	13.7517	0.996503	-0.0482566	47.9	0.928295	-3.7	48.4344	0.938652	-3.16555	63.81	0.908069	-6.46	64.522	0.918201	-5.74803	0.6	0.214286	-2.2	0.606695	0.216677	-2.19331	4	1.02564	0.1	4.04463	1.03708	0.14463	9.207	1.29951	2.122	9.30973	1.31401	2.22473	0.161	1.15827
Beep	1	pre-test	46.5	15.47		71.75	1	0	71.75	1	0	10.27	1	0	10.27	1	0	47.3	1	0	47.3	1	0	64.48	1	0	64.48	1	0	1.6	1	0	1.6	1	0	2.8	1	0	2.8	1	0	12.243	1	0	12.243	1	0	0.043	1
Beep	1	post-test	48.2	16.11	-7.02402	65.31	0.910244	-6.44	60.7226	0.846308	-11.0274	9.61	0.935735	-0.66	8.93499	0.870009	-1.33501	46	0.972516	-1.3	42.7689	0.904206	-4.53105	65.96	1.02295	1.48	61.327	0.9511	-3.15305	0	0	-1.6	0	0	-1.6	9.2	3.28571	6.4	8.55379	3.05492	5.75379	12.025	0.982194	-0.218	11.1804	0.913204	-1.06264	0.319	7.4186
Beep	1	recovery	47.5	15.79	-3.85788	81.54	1.13645	9.79	78.3943	1.0926	6.64429	7.61	0.740993	-2.66	7.31642	0.712407	-2.95358	46.4	0.980973	-0.9	44.6099	0.943128	-2.69006	62.93	0.975962	-1.55	60.5022	0.93831	-3.97776	0	0	-1.6	0	0	-1.6	3	1.07143	0.2	2.88426	1.03009	0.0842637	12.64	1.03243	0.397	12.1524	0.992597	-0.0906357	0.361	8.39535
Beep	1	pre-test	51.5	16.92		82.14	1	0	82.14	1	0	10.19	1	0	10.19	1	0	49.3	1	0	49.3	1	0	66.33	1	0	66.33	1	0	1.9	1	0	1.9	1	0	4.2	1	0	4.2	1	0	6.831	1	0	6.831	1	0	0.57	1
Beep	1	post-test	49.2	16.6	6.7614	102.07	1.24263	19.93	108.971	1.32665	26.8314	16.62	1.63101	6.43	17.7437	1.74129	7.55374	49.3	1	0	52.6334	1.06761	3.33337	69.76	1.05171	3.43	74.4767	1.12282	8.14675	0.3	0.157895	-1.6	0.320284	0.168571	-1.57972	10	2.38095	5.8	10.6761	2.54194	6.47614	5.222	0.764456	-1.609	5.57508	0.816144	-1.25592	0.887	1.55614
Beep	1	recovery	48.2	16.11	12.1742	86.09	1.04809	3.95	96.5707	1.17568	14.4307	10.25	1.00589	0.06	11.4979	1.12835	1.30785	48.9	0.991886	-0.4	54.8532	1.11264	5.55317	66.21	0.998191	-0.12	74.2705	1.11971	7.94051	0	0	-1.9	0	0	-1.9	3.5	0.833333	-0.7	3.9261	0.934785	-0.273904	5.471	0.800908	-1.36	6.13705	0.898411	-0.693952	0.2	0.350877
Beep	1	pre-test	47.1	15.95		0.25	1	0	0.25	1	0	0.01	1	0	0.01	1	0	45.7	1	0	45.7	1	0	66.01	1	0	66.01	1	0	1.8	1	0	1.8	1	0	2.6	1	0	2.6	1	0	8.812	1	0	8.812	1	0	0.164	1
Beep	1	post-test	51.8	17.08	-14.9128	72.99	291.96	72.74	62.1051	248.421	61.8551	13.39	1339	13.39	11.3932	1139.32	11.3832	47	1.02845	1.3	39.991	0.875076	-5.70902	69.96	1.05984	3.95	59.527	0.901788	-6.483	0	0	-1.8	0	0	-1.8	9.9	3.80769	7.3	8.42363	3.23986	5.82363	9.931	1.12699	1.119	8.45001	0.958921	-0.361991	0.25	1.52439
Beep	1	recovery	48.3	16.27	-4.19063	92.72	370.88	92.47	88.8345	355.338	88.5845	9.88	988	9.88	9.46597	946.597	9.45597	44.8	0.980306	-0.9	42.9226	0.939225	-2.7774	65.72	0.995607	-0.29	62.9659	0.953885	-3.04408	0	0	-1.8	0	0	-1.8	2.9	1.11538	0.3	2.77847	1.06864	0.178472	10.294	1.16818	1.482	9.86262	1.11923	1.05062	0.456	2.78049
Beep	1	pre-test	44.9	15.15		147.96	1	0	147.96	1	0	21.15	1	0	21.15	1	0	53.2	1	0	53.2	1	0	71.74	1	0	71.74	1	0	1.8	1	0	1.8	1	0	3.1	1	0	3.1	1	0	7.986	1	0	7.986	1	0	0.187	1
Beep	1	post-test	49.4	16.6	-16.1885	110.36	0.745877	-37.6	92.4943	0.625131	-55.4657	24.65	1.16548	3.5	20.6595	0.97681	-0.490472	51.3	0.964286	-1.9	42.9953	0.808182	-10.2047	68.97	0.961388	-2.77	57.8048	0.805754	-13.9352	0	0	-1.8	0	0	-1.8	8.3	2.67742	5.2	6.95635	2.24398	3.85635	8.698	1.08916	0.712	7.28992	0.912838	-0.696078	0.547	2.92513
Beep	1	recovery	44.7	15.15	0.362976	118.92	0.803731	-29.04	119.352	0.806648	-28.6083	20.26	0.95792	-0.89	20.3335	0.961397	-0.816461	51.9	0.975564	-1.3	52.0884	0.979105	-1.11162	68.36	0.952885	-3.38	68.6081	0.956344	-3.13187	0	0	-1.8	0	0	-1.8	3.6	1.16129	0.5	3.61307	1.16551	0.513067	9.875	1.23654	1.889	9.91084	1.24103	1.92484	0.215	1.14973
Beep	1	pre-test	47.1	15.95		116.16	1	0	116.16	1	0	11.32	1	0	11.32	1	0	51.2	1	0	51.2	1	0	74.16	1	0	74.16	1	0	1	1	0	1	1	0	4	1	0	4	1	0	9.264	1	0	9.264	1	0	0.198	1
Beep	1	post-test	50.5	16.2	-7.87125	101.3	0.872073	-14.86	93.3264	0.80343	-22.8336	16.39	1.44788	5.07	15.0999	1.33391	3.7799	50.3	0.982422	-0.9	46.3408	0.905093	-4.85924	73.13	0.986111	-1.03	67.3738	0.908492	-6.78624	0	0	-1	0	0	-1	7.7	1.925	3.7	7.09391	1.77348	3.09391	10.256	1.10708	0.992	9.44873	1.01994	0.184725	0.452	2.28283
Beep	1	recovery	47.5	16.11	-1.74181	71.23	0.613206	-44.93	69.9893	0.602525	-46.1707	10.89	0.962014	-0.43	10.7003	0.945258	-0.619683	50.2	0.980469	-1	49.3256	0.963391	-1.87439	73.91	0.996629	-0.25	72.6226	0.97927	-1.53737	0.2	0.2	-0.8	0.196516	0.196516	-0.803484	3.1	0.775	-0.9	3.046	0.761501	-0.953996	9.886	1.06714	0.622	9.71381	1.04855	0.449805	0.317	1.60101
Beep	1	pre-test	48.3	16.27		69.54	1	0	69.54	1	0	10.14	1	0	10.14	1	0	48.4	1	0	48.4	1	0	67.22	1	0	67.22	1	0	1.5	1	0	1.5	1	0	3.3	1	0	3.3	1	0	8.654	1	0	8.654	1	0	0.321	1
Beep	1	post-test	51.1	17.08	-9.90141	69.18	0.994823	-0.36	62.3302	0.896322	-7.20979	16.84	1.66075	6.7	15.1726	1.49631	5.0326	51.7	1.06818	3.3	46.581	0.962417	-1.81903	69.93	1.04032	2.71	63.0059	0.93731	-4.21405	0	0	-1.5	0	0	-1.5	11.8	3.57576	8.5	10.6316	3.22171	7.33163	9.687	1.11937	1.033	8.72785	1.00853	0.0738506	0.789	2.45794
Beep	1	recovery	48.2	16.27	0.193424	53.99	0.776388	-15.55	54.0944	0.777889	-15.4456	11.58	1.14201	1.44	11.6024	1.14422	1.4624	49.4	1.02066	1	49.4956	1.02264	1.09555	66.09	0.98319	-1.13	66.2178	0.985091	-1.00217	0	0	-1.5	0	0	-1.5	3.2	0.969697	-0.1	3.20619	0.971573	-0.0938104	11.025	1.27398	2.371	11.0463	1.27644	2.39232	0.245	0.76324
Beep	1	pre-test	46.2	15.31		85.85	1	0	85.85	1	0	11.88	1	0	11.88	1	0	47	1	0	47	1	0	68.96	1	0	68.96	1	0	1.5	1	0	1.5	1	0	3.7	1	0	3.7	1	0	9.065	1	0	9.065	1	0	0.197	1
Beep	1	post-test	45.7	15.31	0.929368	103.35	1.20384	17.5	104.311	1.21503	18.4605	12.36	1.0404	0.48	12.4749	1.05007	0.59487	47.5	1.01064	0.5	47.9414	1.02003	0.94145	70.38	1.02059	1.42	71.0341	1.03008	2.07409	1.9	1.26667	0.4	1.91766	1.27844	0.417658	8	2.16216	4.3	8.07435	2.18226	4.37435	8.29	0.914506	-0.775	8.36704	0.923005	-0.697955	0.365	1.85279
Beep	1	recovery	49.9	14.98	-4.82589	82.09	0.956203	-3.76	78.1284	0.910057	-7.72157	9.06	0.762626	-2.82	8.62277	0.725823	-3.25723	46.2	0.982979	-0.8	43.9704	0.935541	-3.02956	68.28	0.990139	-0.68	64.9849	0.942356	-3.97512	0	0	-1.5	0	0	-1.5	2.5	0.675676	-1.2	2.37935	0.643068	-1.32065	10.26	1.13183	1.195	9.76486	1.07721	0.699864	0.217	1.10152
Beep	1	pre-test	42.8	13.21		154.89	1	0	154.89	1	0	18.85	1	0	18.85	1	0	50.4	1	0	50.4	1	0	68.63	1	0	68.63	1	0	1.7	1	0	1.7	1	0	3.2	1	0	3.2	1	0	8.456	1	0	8.456	1	0	0.354	1
Beep	1	post-test	43.5	13.05	-0.0127267	112.38	0.725547	-42.51	112.366	0.725455	-42.5243	19.57	1.0382	0.72	19.5675	1.03806	0.717509	50.6	1.00397	0.2	50.5936	1.00384	0.19356	69.38	1.01093	0.75	69.3712	1.0108	0.74117	0	0	-1.7	0	0	-1.7	9.5	2.96875	6.3	9.49879	2.96837	6.29879	9.789	1.15764	1.333	9.78775	1.15749	1.33175	0.458	1.29379
Beep	1	recovery	43.6	13.05	-0.189695	125.82	0.812318	-29.07	125.581	0.810777	-29.3087	16.09	0.853581	-2.76	16.0595	0.851962	-2.79052	51.4	1.01984	1	51.3025	1.01791	0.902497	69.41	1.01137	0.78	69.2783	1.00945	0.648332	0	0	-1.7	0	0	-1.7	3.3	1.03125	0.1	3.29374	1.02929	0.0937401	11.235	1.32864	2.779	11.2137	1.32612	2.75769	0.314	0.887006
Beep	1	pre-test	46.9	14.5		85.45	1	0	85.45	1	0	12.43	1	0	12.43	1	0	47.6	1	0	47.6	1	0	65.64	1	0	65.64	1	0	2.2	1	0	2.2	1	0	3.5	1	0	3.5	1	0	9.876	1	0	9.876	1	0	0.254	1
Beep	1	post-test	49.1	14.82	-6.21291	123.46	1.44482	38.01	115.79	1.35506	30.3395	18.8	1.51247	6.37	17.632	1.4185	5.20197	48.6	1.02101	1	45.5805	0.957574	-2.01947	68.65	1.04586	3.01	64.3848	0.980878	-1.25516	0.3	0.136364	-1.9	0.281361	0.127891	-1.91864	11.8	3.37143	8.3	11.0669	3.16196	7.56688	8.786	0.889631	-1.09	8.24013	0.834359	-1.63587	0.789	3.1063
Beep	1	recovery	45.2	13.7	9.22787	64.64	0.756466	-20.81	70.6049	0.826271	-14.8451	17.24	1.38697	4.81	18.8309	1.51495	6.40089	45.9	0.964286	-1.7	50.1356	1.05327	2.53559	63.23	0.963285	-2.41	69.0648	1.05218	3.42478	0.1	0.0454545	-2.1	0.109228	0.049649	-2.09077	3	0.857143	-0.5	3.27684	0.936239	-0.223164	9.587	0.970737	-0.289	10.4717	1.06032	0.595676	0.213	0.838583
Beep	1	pre-test	45.8	14.02		68.02	1	0	68.02	1	0	5.22	1	0	5.22	1	0	46.3	1	0	46.3	1	0	68.58	1	0	68.58	1	0	2	1	0	2	1	0	3.5	1	0	3.5	1	0	7.654	1	0	7.654	1	0	0.356	1
Beep	1	post-test	49.3	14.82	-11.5071	96.94	1.42517	28.92	85.785	1.26117	17.765	7.86	1.50575	2.64	6.95554	1.33248	1.73554	49	1.05832	2.7	43.3615	0.936534	-2.93847	74.93	1.09259	6.35	66.3077	0.966867	-2.27226	0.4	0.2	-1.6	0.353972	0.176986	-1.64603	10.2	2.91429	6.7	9.02628	2.57894	5.52628	9.876	1.29031	2.222	8.73956	1.14183	1.08556	0.621	1.74438
Beep	1	recovery	45.7	13.7	2.52458	103.1	1.51573	35.08	105.703	1.554	37.6828	9.85	1.88697	4.63	10.0987	1.93461	4.87867	46.7	1.00864	0.4	47.879	1.0341	1.57898	69.48	1.01312	0.9	71.2341	1.0387	2.65408	1.2	0.6	-0.8	1.23029	0.615147	-0.769705	3.1	0.885714	-0.4	3.17826	0.908075	-0.321738	8.654	1.13065	1	8.87248	1.15919	1.21848	0.215	0.603933
Beep	1	pre-test	48.7	14.66		64.53	1	0	64.53	1	0	21.14	1	0	21.14	1	0	46.3	1	0	46.3	1	0	64.02	1	0	64.02	1	0	2	1	0	2	1	0	3	1	0	3	1	0	10.265	1	0	10.265	1	0	0.187	1
Beep	1	post-test	52	15.79	-13.1288	71.29	1.10476	6.76	61.9305	0.959716	-2.59954	8.44	0.399243	-12.7	7.33193	0.346827	-13.8081	46.6	1.00648	0.3	40.482	0.874341	-5.81803	64.15	1.00203	0.13	55.7279	0.870476	-8.29214	0	0	-2	0	0	-2	6.9	2.3	3.9	5.99411	1.99804	2.99411	11.235	1.0945	0.97	9.75998	0.950801	-0.505023	0.451	2.41176
Beep	1	recovery	46	14.34	7.61213	58.52	0.906865	-6.01	62.9746	0.975897	-1.55538	16.74	0.791864	-4.4	18.0143	0.852141	-3.12573	47	1.01512	0.7	50.5777	1.09239	4.2777	62.77	0.980475	-1.25	67.5481	1.05511	3.52813	0	0	-2	0	0	-2	2.6	0.866667	-0.4	2.79792	0.932638	-0.202085	10.256	0.999123	-0.009	11.0367	1.07518	0.7717	0.213	1.13904
Beep	1	pre-test	43.1	12.89		56.83	1	0	56.83	1	0	8.16	1	0	8.16	1	0	46.3	1	0	46.3	1	0	61.54	1	0	61.54	1	0	0.9	1	0	0.9	1	0	3.4	1	0	3.4	1	0	8.647	1	0	8.647	1	0	0.236	1
Beep	1	post-test	47.2	14.02	-14.6848	89.77	1.57962	32.94	76.5875	1.34766	19.7575	21.33	2.61397	13.17	18.1977	2.23011	10.0377	46.5	1.00432	0.2	39.6716	0.856838	-6.62842	62.93	1.02259	1.39	53.6889	0.872422	-7.85113	0	0	-0.9	0	0	-0.9	9.7	2.85294	6.3	8.27558	2.43399	4.87558	11.23	1.29872	2.583	9.5809	1.108	0.9339	0.478	2.02542
Beep	1	recovery	40.9	12.41	7.88383	90.94	1.60021	34.11	98.1096	1.72637	41.2796	6.07	0.743873	-2.09	6.54855	0.802518	-1.61145	48.8	1.054	2.5	52.6473	1.13709	6.34731	61.86	1.0052	0.32	66.7369	1.08445	5.19694	0	0	-0.9	0	0	-0.9	3.4	1	0	3.66805	1.07884	0.26805	7.564	0.874754	-1.083	8.16033	0.943718	-0.486667	0.14	0.59322
Beep	1	pre-test	45.1	13.7		126.5	1	0	126.5	1	0	15.32	1	0	15.32	1	0	51.3	1	0	51.3	1	0	71.3	1	0	71.3	1	0	2.1	1	0	2.1	1	0	5.7	1	0	5.7	1	0	6.549	1	0	6.549	1	0	0.321	1
Beep	1	post-test	44.7	13.37	3.21479	98.38	0.777708	-28.12	101.543	0.802709	-24.9573	7.62	0.497389	-7.7	7.86497	0.513379	-7.45503	51.8	1.00975	0.5	53.4653	1.04221	2.16526	73.64	1.03282	2.34	76.0074	1.06602	4.70737	0	0	-2.1	0	0	-2.1	12.9	2.26316	7.2	13.3147	2.33591	7.61471	8.526	1.30188	1.977	8.80009	1.34373	2.25109	0.987	3.07477
Beep	1	recovery	44.2	13.21	5.40946	104.7	0.827668	-21.8	110.364	0.87244	-16.1363	10.45	0.682115	-4.87	11.0153	0.719014	-4.30471	49.8	0.97076	-1.5	52.4939	1.02327	1.19391	69.13	0.969565	-2.17	72.8696	1.02201	1.56956	0	0	-2.1	0	0	-2.1	3.2	0.561404	-2.5	3.3731	0.591772	-2.3269	8.975	1.37044	2.426	9.4605	1.44457	2.9115	0.214	0.666667
Beep	1	pre-test	42.6	13.05		97	1	0	97	1	0	16.42	1	0	16.42	1	0	49.4	1	0	49.4	1	0	64.43	1	0	64.43	1	0	1.6	1	0	1.6	1	0	5.2	1	0	5.2	1	0	9.644	1	0	9.644	1	0	0.365	1
Beep	1	post-test	43.3	12.89	0.00662264	81.64	0.841649	-15.36	81.6454	0.841705	-15.3546	15.72	0.957369	-0.7	15.721	0.957432	-0.698959	52.1	1.05466	2.7	52.1035	1.05473	2.70345	67.25	1.04377	2.82	67.2545	1.04384	2.82445	0	0	-1.6	0	0	-1.6	9.6	1.84615	4.4	9.60064	1.84628	4.40064	9.872	1.02364	0.228	9.87265	1.02371	0.228654	0.215	0.589041
Beep	1	recovery	41.1	12.41	7.90514	81.94	0.844742	-15.06	88.4175	0.91152	-8.58253	14.76	0.898904	-1.66	15.9268	0.969963	-0.493201	50	1.01215	0.6	53.9526	1.09216	4.55257	61.09	0.948161	-3.34	65.9193	1.02311	1.48925	0.1	0.0625	-1.5	0.107905	0.0674407	-1.49209	4	0.769231	-1.2	4.31621	0.83004	-0.883794	10.265	1.06439	0.621	11.0765	1.14853	1.43246	0.987	2.70411
Beep	1	pre-test	40.5	12.41		81.42	1	0	81.42	1	0	10.29	1	0	10.29	1	0	48	1	0	48	1	0	68.02	1	0	68.02	1	0	2	1	0	2	1	0	2.5	1	0	2.5	1	0	7.689	1	0	7.689	1	0	0.258	1
Beep	1	post-test	45.6	13.7	-17.1804	108.24	1.3294	26.82	89.6439	1.10101	8.22394	9.96	0.96793	-0.33	8.24883	0.801636	-2.04117	50.3	1.04792	2.3	41.6583	0.86788	-6.34174	72.18	1.06116	4.16	59.7792	0.878847	-8.24081	0	0	-2	0	0	-2	12.7	5.08	10.2	10.5181	4.20724	8.01809	8.975	1.16725	1.286	7.43306	0.966713	-0.255941	0.645	2.5
Beep	1	recovery	42.6	13.05	-8.26054	105.45	1.29514	24.03	96.7393	1.18815	15.3193	8.88	0.862974	-1.41	8.14646	0.791687	-2.14354	49.8	1.0375	1.8	45.6863	0.951797	-2.31375	70.54	1.03705	2.52	64.713	0.951382	-3.30698	0.5	0.25	-1.5	0.458697	0.229349	-1.5413	3.4	1.36	0.9	3.11914	1.24766	0.619142	9.687	1.25985	1.998	8.8868	1.15578	1.1978	0.215	0.833333
Beep	1	pre-test	40.6	12.25		183.59	1	0	183.59	1	0	14.28	1	0	14.28	1	0	48.6	1	0	48.6	1	0	65.82	1	0	65.82	1	0	1.5	1	0	1.5	1	0	3	1	0	3	1	0	8.265	1	0	8.265	1	0	0.217	1
Beep	1	post-test	44.2	13.21	-12.8874	149.6	0.814859	-33.99	130.32	0.709845	-53.2695	15.01	1.05112	0.73	13.0756	0.915658	-1.2044	49.8	1.02469	1.2	43.3821	0.892635	-5.21792	70.63	1.07308	4.81	61.5276	0.934786	-4.29236	0.5	0.333333	-1	0.435563	0.290375	-1.06444	11.3	3.76667	8.3	9.84372	3.28124	6.84372	10.265	1.24198	2	8.94211	1.08192	0.677109	0.542	2.4977
Beep	1	recovery	40.9	12.08	0.895127	151.12	0.823139	-32.47	152.473	0.830507	-31.1173	9.7	0.679272	-4.58	9.78683	0.685352	-4.49317	50.5	1.03909	1.9	50.952	1.0484	2.35204	67.37	1.02355	1.55	67.973	1.03271	2.15305	0.4	0.266667	-1.1	0.403581	0.269054	-1.09642	3.2	1.06667	0.2	3.22864	1.07621	0.228644	11.354	1.37374	3.089	11.4556	1.38604	3.19063	0.325	1.4977
Beep	1	pre-test	47.7	13.86		76.47	1	0	76.47	1	0	7.25	1	0	7.25	1	0	43.9	1	0	43.9	1	0	61.54	1	0	61.54	1	0	1.8	1	0	1.8	1	0	3.1	1	0	3.1	1	0	11.025	1	0	11.025	1	0	0.259	1
Beep	1	post-test	49.6	14.5	-7.88633	91.37	1.19485	14.9	84.1643	1.10062	7.69426	9.87	1.36138	2.62	9.09162	1.25402	1.84162	45.2	1.02961	1.3	41.6354	0.948414	-2.26462	64.08	1.04127	2.54	59.0264	0.959156	-2.51356	0	0	-1.8	0	0	-1.8	10	3.22581	6.9	9.21137	2.97141	6.11137	9.875	0.895692	-1.15	9.09622	0.825054	-1.92878	0.424	1.63707
Beep	1	recovery	46.7	13.7	3.10226	88.02	1.15104	11.55	90.7506	1.18675	14.2806	8.89	1.22621	1.64	9.16579	1.26425	1.91579	44.9	1.02278	1	46.2929	1.05451	2.39291	61.35	0.996913	-0.19	63.2532	1.02784	1.71324	0	0	-1.8	0	0	-1.8	3.2	1.03226	0.1	3.29927	1.06428	0.199272	8.654	0.784943	-2.371	8.92247	0.809294	-2.10253	0.564	2.17761
Beep	1	pre-test	46.8	14.5		81.7	1	0	81.7	1	0	14.79	1	0	14.79	1	0	45.7	1	0	45.7	1	0	69.61	1	0	69.61	1	0	4.5	1	0	4.5	1	0	2.9	1	0	2.9	1	0	10.265	1	0	10.265	1	0	0.189	1
Beep	1	post-test	50.5	15.47	-12.789	74.02	0.905998	-7.68	64.5536	0.79013	-17.1464	13.38	0.904665	-1.41	11.6688	0.788968	-3.12117	48.1	1.05252	2.4	41.9485	0.91791	-3.75151	74.15	1.06522	4.54	64.667	0.928989	-4.94305	2	0.444444	-2.5	1.74422	0.387604	-2.75578	13.4	4.62069	10.5	11.6863	4.02975	8.78627	8.654	0.843059	-1.611	7.54724	0.73524	-2.71776	0.325	1.71958
Beep	1	recovery	45.2	13.86	7.764	0	0	-81.7	0	0	-81.7	11.85	0.801217	-2.94	12.77	0.863424	-2.01997	47.3	1.03501	1.6	50.9724	1.11537	5.27237	69.06	0.992099	-0.55	74.4218	1.06913	4.81182	2.9	0.644444	-1.6	3.12516	0.694479	-1.37484	2.9	1	0	3.12516	1.07764	0.225156	7.654	0.745641	-2.611	8.24826	0.803532	-2.01674	0.456	2.4127
Beep	1	pre-test	42.6	12.89		101.19	1	0	101.19	1	0	8.56	1	0	8.56	1	0	49.1	1	0	49.1	1	0	68.64	1	0	68.64	1	0	1.3	1	0	1.3	1	0	2.5	1	0	2.5	1	0	9.875	1	0	9.875	1	0	0.201	1
Beep	1	post-test	44.5	13.37	-6.78139	102.46	1.01255	1.27	95.5118	0.943886	-5.67822	12.04	1.40654	3.48	11.2235	1.31116	2.66352	51	1.0387	1.9	47.5415	0.968258	-1.55851	72.14	1.05099	3.5	67.2479	0.979719	-1.3921	0.7	0.538462	-0.6	0.65253	0.501946	-0.64747	7.8	3.12	5.3	7.27105	2.90842	4.77105	10.256	1.03858	0.381	9.5605	0.968152	-0.3145	0.345	1.71642
Beep	1	recovery	40.4	12.08	10.795	96.83	0.956913	-4.36	107.283	1.06021	6.09285	9.91	1.15771	1.35	10.9798	1.28269	2.41979	50.2	1.0224	1.1	55.6191	1.13277	6.51911	71	1.03438	2.36	78.6645	1.14604	10.0245	0	0	-1.3	0	0	-1.3	2.6	1.04	0.1	2.88067	1.15227	0.380671	6.548	0.663089	-3.327	7.25486	0.734669	-2.62014	0.213	1.0597
Beep	1	pre-test	48.3	14.5		80.77	1	0	80.77	1	0	11.57	1	0	11.57	1	0	48.6	1	0	48.6	1	0	68.48	1	0	68.48	1	0	0.5	1	0	0.5	1	0	3.6	1	0	3.6	1	0	8.265	1	0	8.265	1	0	0.178	1
Beep	1	post-test	49.7	14.82	-4.8087	68.22	0.844621	-12.55	64.9395	0.804005	-15.8305	14.48	1.25151	2.91	13.7837	1.19133	2.2137	52.6	1.0823	4	50.0706	1.03026	1.47062	77.07	1.12544	8.59	73.3639	1.07132	4.88393	0	0	-0.5	0	0	-0.5	12.8	3.55556	9.2	12.1845	3.38458	8.58449	9.236	1.11748	0.971	8.79187	1.06375	0.526868	0.456	2.5618
Beep	1	recovery	42.1	13.21	22.9287	68.26	0.845116	-12.51	83.9111	1.03889	3.14111	12.45	1.07606	0.88	15.3046	1.32278	3.73462	50.5	1.03909	1.9	62.079	1.27735	13.479	69.98	1.0219	1.5	86.0255	1.25621	17.5455	0	0	-0.5	0	0	-0.5	4.4	1.22222	0.8	5.40886	1.50246	1.80886	7.548	0.913249	-0.717	9.27866	1.12264	1.01366	0.218	1.22472
Beep	1	pre-test	42.1	12.89		88.83	1	0	88.83	1	0	9.82	1	0	9.82	1	0	41.2	1	0	41.2	1	0	61.6	1	0	61.6	1	0	1.2	1	0	1.2	1	0	2.8	1	0	2.8	1	0	9.875	1	0	9.875	1	0	0.205	1
Beep	1	post-test	44.2	13.21	-5.96149	171.03	1.92536	82.2	160.834	1.81058	72.0041	3.38	0.344196	-6.44	3.1785	0.323676	-6.6415	43.2	1.04854	2	40.6246	0.986035	-0.575364	65.76	1.06753	4.16	61.8397	1.00389	0.239724	0.1	0.0833333	-1.1	0.0940385	0.0783654	-1.10596	9.8	3.5	7	9.21577	3.29135	6.41577	10.236	1.03656	0.361	9.62578	0.974763	-0.249218	0.604	2.94634
Beep	1	recovery	40.3	12.41	7.0969	81.45	0.91692	-7.38	87.2304	0.981993	-1.59957	16.81	1.71181	6.99	18.003	1.8333	8.18299	43.8	1.06311	2.6	46.9084	1.13855	5.70844	63.03	1.02321	1.43	67.5032	1.09583	5.90318	0.5	0.416667	-0.7	0.535485	0.446237	-0.664515	2.2	0.785714	-0.6	2.35613	0.841476	-0.443868	6.587	0.667038	-3.288	7.05447	0.714377	-2.82053	0.301	1.46829
Beep	1	pre-test	37.6	11.28		70.78	1	0	70.78	1	0	15.2	1	0	15.2	1	0	49.3	1	0	49.3	1	0	71.63	1	0	71.63	1	0	1.9	1	0	1.9	1	0	3.2	1	0	3.2	1	0	9.687	1	0	9.687	1	0	0.199	1
Beep	1	post-test	39	11.76	-6.23365	132.91	1.87779	62.13	124.625	1.76074	53.8449	9.49	0.624342	-5.71	8.89843	0.585423	-6.30157	51	1.03448	1.7	47.8208	0.969997	-1.47916	75.45	1.05333	3.82	70.7467	0.987669	-0.883287	0	0	-1.9	0	0	-1.9	5.9	1.84375	2.7	5.53221	1.72882	2.33221	8.567	0.884381	-1.12	8.03296	0.829252	-1.65404	0.32	1.60804
Beep	1	recovery	36.5	10.96	4.734	125.71	1.77607	54.93	131.661	1.86015	60.8811	0.93	0.0611842	-14.27	0.974026	0.0640807	-14.226	49.6	1.00609	0.3	51.9481	1.05371	2.64806	69.87	0.975429	-1.76	73.1776	1.02161	1.54764	0	0	-1.9	0	0	-1.9	2	0.625	-1.2	2.09468	0.654587	-1.10532	8.978	0.926809	-0.709	9.40302	0.970684	-0.283982	0.201	1.01005
Beep	1	pre-test	41.4	12.57		156.34	1	0	156.34	1	0	4.59	1	0	4.59	1	0	48.9	1	0	48.9	1	0	71.05	1	0	71.05	1	0	3.3	1	0	3.3	1	0	2.5	1	0	2.5	1	0	5.487	1	0	5.487	1	0	0.259	1
Beep	1	post-test	44.1	13.37	-10.3154	129.64	0.829218	-26.7	116.267	0.743681	-40.0728	19.44	4.23529	14.85	17.4347	3.79841	12.8447	49.6	1.01431	0.7	44.4836	0.909685	-4.41642	71.01	0.999437	-0.04	63.6851	0.896341	-7.36494	1.6	0.484848	-1.7	1.43495	0.434835	-1.86505	8.3	3.32	5.8	7.44383	2.97753	4.94383	6.287	1.1458	0.8	5.63847	1.02761	0.151473	0.424	1.63707
Beep	1	recovery	41.6	12.25	2.26203	114.21	0.730523	-42.13	116.793	0.747048	-39.5465	0.73	0.159041	-3.86	0.746513	0.162639	-3.84349	49.6	1.01431	0.7	50.722	1.03726	1.82197	69.87	0.983392	-1.18	71.4505	1.00564	0.400482	0	0	-3.3	0	0	-3.3	2	0.8	-0.5	2.04524	0.818096	-0.454759	9.658	1.76016	4.171	9.87647	1.79998	4.38947	0.356	1.37452
Beep	1	pre-test	46	13.86		114.17	1	0	114.17	1	0	1.09	1	0	1.09	1	0	48.2	1	0	48.2	1	0	66.8	1	0	66.8	1	0	2.3	1	0	2.3	1	0	3.2	1	0	3.2	1	0	7.689	1	0	7.689	1	0	0.215	1
Beep	1	post-test	49.4	14.98	-13.3022	60.96	0.533941	-53.21	52.851	0.462915	-61.319	6.76	6.20183	5.67	5.86077	5.37686	4.77077	51	1.05809	2.8	44.2159	0.917342	-3.98411	71.81	1.075	5.01	62.2577	0.932002	-4.5423	0	0	-2.3	0	0	-2.3	1.8	0.5625	-1.4	1.56056	0.487675	-1.63944	9.326	1.2129	1.637	8.08544	1.05156	0.396439	0.501	2.33023
Beep	1	recovery	45.1	13.86	1.66667	83.92	0.735044	-30.25	85.3187	0.747295	-28.8513	18.63	17.0917	17.54	18.9405	17.3766	17.8505	48.6	1.0083	0.4	49.41	1.0251	1.21	65.09	0.974401	-1.71	66.1748	0.990641	-0.625167	0.2	0.0869565	-2.1	0.203333	0.0884058	-2.09667	2.6	0.8125	-0.6	2.64333	0.826042	-0.556667	5.456	0.709585	-2.233	5.54693	0.721412	-2.14207	0.378	1.75814
Beep	1	pre-test	42.8	12.73		98.46	1	0	98.46	1	0	22.72	1	0	22.72	1	0	47.3	1	0	47.3	1	0	62.13	1	0	62.13	1	0	1.4	1	0	1.4	1	0	3.6	1	0	3.6	1	0	7.524	1	0	7.524	1	0	0.263	1
Beep	1	post-test	51.6	15.15	-28.9007	60.87	0.618221	-37.59	43.2781	0.43955	-55.1819	12.17	0.535651	-10.55	8.65278	0.380844	-14.0672	48.6	1.02748	1.3	34.5542	0.730534	-12.7458	65.86	1.06004	3.73	46.826	0.753677	-15.304	0.3	0.214286	-1.1	0.213298	0.152356	-1.1867	10.5	2.91667	6.9	7.46542	2.07373	3.86542	9.87	1.3118	2.346	7.0175	0.932682	-0.506503	0.509	1.93536
Beep	1	recovery	46.8	13.86	-14.5758	55.62	0.564899	-42.84	47.5129	0.482561	-50.9471	9.13	0.401849	-13.59	7.79923	0.343276	-14.9208	48.2	1.01903	0.9	41.1745	0.870496	-6.12555	61.76	0.994045	-0.37	52.758	0.849154	-9.37203	0	0	-1.4	0	0	-1.4	2.9	0.805556	-0.7	2.4773	0.688139	-1.1227	10.28	1.36629	2.756	8.7816	1.16715	1.2576	0.401	1.52471
RSA	1	pre-test	45	14.02		83.84	1	0	83.84	1	0	15.9	1	0	15.9	1	0	54.2	1	0	54.2	1	0	72.14	1	0	72.14	1	0	4.45	1	0	4.45	1	0	6	1	0	6	1	0	6.027	1	0	6.027	1	0	0.271	1
RSA	1	post-test	47.5	15.47	-13.4924	78.02	0.930582	-5.82	67.4932	0.805024	-16.3468	13	0.81761	-2.9	11.246	0.707295	-4.65401	59.3	1.0941	5.1	51.299	0.946476	-2.90099	78.06	1.08206	5.92	67.5278	0.936067	-4.61216	4.85	1.08989	0.4	4.19562	0.942836	-0.254381	23.7	3.95	17.7	20.5023	3.41705	14.5023	5.086	0.843869	-0.941	4.39978	0.730011	-1.62722	0.23	0.848708
RSA	1	recovery	45.2	14.66	-4.71338	68.58	0.817987	-15.26	65.3476	0.779432	-18.4924	13.84	0.87044	-2.06	13.1877	0.829413	-2.71233	55	1.01476	0.8	52.4076	0.966931	-1.79236	71.48	0.990851	-0.66	68.1109	0.944149	-4.02913	6.35	1.42697	1.9	6.0507	1.35971	1.6007	6.4	1.06667	0.4	6.09834	1.01639	0.0983435	6.24	1.03534	0.213	5.94588	0.986541	-0.081115	0.379	1.39852
RSA	1	pre-test	47.3	14.5		87.55	1	0	87.55	1	0	3.03	1	0	3.03	1	0	57.3	1	0	57.3	1	0	75.69	1	0	75.69	1	0	4.27	1	0	4.27	1	0	7.6	1	0	7.6	1	0	6.422	1	0	6.422	1	0	0.195	1
RSA	1	post-test	50.6	16.11	-15.6299	87.4	0.998287	-0.15	73.7395	0.842256	-13.8105	0.82	0.270627	-2.21	0.691835	0.228328	-2.33816	59.8	1.04363	2.5	50.4533	0.880512	-6.84665	81.7	1.0794	6.01	68.9304	0.910694	-6.75959	8.12	1.90164	3.85	6.85086	1.60442	2.58086	29.2	3.84211	21.6	24.6361	3.24159	17.0361	6.193	0.964341	-0.229	5.22504	0.813616	-1.19696	0.042	0.215385
RSA	1	recovery	46.9	15.47	-5.55878	85.67	0.978527	-1.88	80.9078	0.924132	-6.64221	3.92	1.29373	0.89	3.7021	1.22181	0.672096	56.1	0.979058	-1.2	52.9815	0.924634	-4.31847	75.36	0.99564	-0.33	71.1709	0.940295	-4.5191	6.91	1.61827	2.64	6.52589	1.52831	2.25589	8.2	1.07895	0.6	7.74418	1.01897	0.14418	6.211	0.967144	-0.211	5.86574	0.913383	-0.556256	0.446	2.28718
RSA	1	pre-test	43	13.21		107.06	1	0	107.06	1	0	4.9	1	0	4.9	1	0	58.2	1	0	58.2	1	0	73.95	1	0	73.95	1	0	2.63	1	0	2.63	1	0	5.3	1	0	5.3	1	0	8.997	1	0	8.997	1	0	0.259	1
RSA	1	post-test	46.8	14.98	-17.6947	110.91	1.03596	3.85	91.2848	0.852651	-15.7752	3.33	0.679592	-1.57	2.74077	0.55934	-2.15923	60.6	1.04124	2.4	49.877	0.856993	-8.32299	78.08	1.05585	4.13	64.264	0.869019	-9.68602	2.99	1.13688	0.36	2.46093	0.935714	-0.169072	25.8	4.86792	20.5	21.2348	4.00656	15.9348	9.706	1.0788	0.709	7.98855	0.887913	-1.00845	0.525	2.02703
RSA	1	recovery	41.7	13.7	-1.37751	92.18	0.861013	-14.88	90.9102	0.849152	-16.1498	5.46	1.11429	0.56	5.38479	1.09894	0.484788	56.3	0.967354	-1.9	55.5245	0.954029	-2.67554	72.6	0.981744	-1.35	71.5999	0.968221	-2.35007	2.95	1.12167	0.32	2.90936	1.10622	0.279363	5.4	1.01887	0.1	5.32561	1.00483	0.0256143	7.9	0.87807	-1.097	7.79118	0.865975	-1.20582	0.183	0.706564
RSA	2	pre-test	47.4	14.5		62.91	1	0	62.91	1	0	7.4	1	0	7.4	1	0	48.1	1	0	48.1	1	0	56.26	1	0	56.26	1	0	2.57	1	0	2.57	1	0	4.4	1	0	4.4	1	0	9.957	1	0	9.957	1	0	0.24	1
RSA	2	post-test	50.9	16.6	-18.4628	69.17	1.09951	6.26	56.3993	0.896507	-6.51074	5.74	0.775676	-1.66	4.68023	0.632464	-2.71977	59	1.22661	10.9	48.1069	1.00014	0.00693344	77.18	1.37185	20.92	62.9304	1.11856	6.67039	4.19	1.63035	1.62	3.41641	1.32934	0.846408	15.1	3.43182	10.7	12.3121	2.79821	7.91211	9.66	0.970172	-0.297	7.87649	0.791051	-2.08051	0.321	1.3375
RSA	2	recovery	43.9	14.82	4.35107	59.04	0.938484	-3.87	61.6089	0.979318	-1.30113	7.7	1.04054	0.3	8.03503	1.08582	0.635033	55.2	1.14761	7.1	57.6018	1.19754	9.50179	67.78	1.20476	11.52	70.7292	1.25718	14.4692	4.19	1.63035	1.62	4.37231	1.70129	1.80231	3.5	0.795455	-0.9	3.65229	0.830065	-0.747712	8.397	0.843326	-1.56	8.76236	0.88002	-1.19464	0.436	1.81667
RSA	2	pre-test	43.9	13.86		99.38	1	0	99.38	1	0	5.27	1	0	5.27	1	0	51.4	1	0	51.4	1	0	68.9	1	0	68.9	1	0	4.49	1	0	4.49	1	0	5.4	1	0	5.4	1	0	7.881	1	0	7.881	1	0	0.366	1
RSA	2	post-test	46.8	15.31	-14.1507	103.12	1.03763	3.74	88.5278	0.890801	-10.8522	3.42	0.648956	-1.85	2.93605	0.557125	-2.33395	56.8	1.10506	5.4	48.7624	0.948685	-2.63759	76.2	1.10595	7.3	65.4172	0.949451	-3.48283	5.7	1.26949	1.21	4.89341	1.08985	0.403411	22	4.07407	16.6	18.8868	3.49756	13.4868	6.832	0.866895	-1.049	5.86522	0.744223	-2.01578	0.169	0.461749
RSA	2	recovery	45	14.5	-6.28803	93.89	0.944757	-5.49	87.9862	0.885351	-11.3938	4.32	0.819734	-0.95	4.04836	0.768189	-1.22164	53.7	1.04475	2.3	50.3233	0.979053	-1.07667	73.15	1.06168	4.25	68.5503	0.994925	-0.349696	5.67	1.26281	1.18	5.31347	1.1834	0.823469	5.2	0.962963	-0.2	4.87302	0.902412	-0.526978	7.569	0.960411	-0.312	7.09306	0.90002	-0.787941	0.32	0.874317
RSA	2	pre-test	45.6	14.18		69.16	1	0	69.16	1	0	10.69	1	0	10.69	1	0	51.8	1	0	51.8	1	0	69.11	1	0	69.11	1	0	4.04	1	0	4.04	1	0	5.5	1	0	5.5	1	0	6.065	1	0	6.065	1	0	0.158	1
RSA	2	post-test	47.8	15.31	-11.1264	78.03	1.12825	8.87	69.348	1.00272	0.188049	3.44	0.321796	-7.25	3.05725	0.285992	-7.63275	58.4	1.12741	6.6	51.9022	1.00197	0.102167	77.29	1.11836	8.18	68.6904	0.993928	-0.419615	4.06	1.00495	0.02	3.60827	0.893135	-0.431733	23.1	4.2	17.6	20.5298	3.73269	15.0298	7.794	1.28508	1.729	6.92681	1.1421	0.861806	0.097	0.613924
RSA	2	recovery	45.2	14.82	-3.61495	77.05	1.11408	7.89	74.2647	1.07381	5.10468	4.19	0.391955	-6.5	4.03853	0.377786	-6.65147	57	1.10039	5.2	54.9395	1.06061	3.13948	77.1	1.11561	7.99	74.3129	1.07528	5.20288	4.67	1.15594	0.63	4.50118	1.11415	0.461182	4.4	0.8	-1.1	4.24094	0.77108	-1.25906	7.007	1.15532	0.942	6.7537	1.11355	0.688701	0.392	2.48101
RSA	1	pre-test	47.9	15.31		99.21	1	0	99.21	1	0	2.74	1	0	2.74	1	0	54.4	1	0	54.4	1	0	72.79	1	0	72.79	1	0	4.23	1	0	4.23	1	0	4.9	1	0	4.9	1	0	11.572	1	0	11.572	1	0	0.866	1
RSA	1	post-test	48.6	15.95	-5.3022	95.49	0.962504	-3.72	90.4269	0.91147	-8.78307	0	0	-2.74	0	0	-2.74	57.9	1.06434	3.5	54.83	1.0079	0.430027	80.31	1.10331	7.52	76.0518	1.04481	3.2618	5.02	1.18676	0.79	4.75383	1.12384	0.52383	14.5	2.95918	9.6	13.7312	2.80228	8.83118	13.664	1.18078	2.092	12.9395	1.11817	1.36751	0.537	0.620092
RSA	1	recovery	46	15.15	4.74145	91.39	0.921177	-7.82	95.7232	0.964854	-3.48679	1.85	0.675182	-0.89	1.93772	0.707196	-0.802283	56	1.02941	1.6	58.6552	1.07822	4.25521	77.44	1.06388	4.65	81.1118	1.11433	8.32178	5.8	1.37116	1.57	6.075	1.43617	1.845	4.4	0.897959	-0.5	4.60862	0.940535	-0.291376	10.186	0.880228	-1.386	10.669	0.921964	-0.903036	0.262	0.30254
RSA	1	pre-test	45.8	14.5		69.23	1	0	69.23	1	0	1.68	1	0	1.68	1	0	50.2	1	0	50.2	1	0	68.95	1	0	68.95	1	0	3.97	1	0	3.97	1	0	6.1	1	0	6.1	1	0	8.359	1	0	8.359	1	0	0.365	1
RSA	1	post-test	48.2	15.63	-11.3376	82.18	1.18706	12.95	72.8628	1.05247	3.63276	4.42	2.63095	2.74	3.91888	2.33267	2.23888	57.1	1.13745	6.9	50.6262	1.00849	0.426232	75.29	1.09195	6.34	66.7539	0.96815	-2.19608	4.97	1.25189	1	4.40652	1.10996	0.436521	25.8	4.22951	19.7	22.8749	3.74998	16.7749	6.906	0.826175	-1.453	6.12303	0.732507	-2.23597	0.456	1.24932
RSA	1	recovery	44	14.66	2.19338	59.64	0.861476	-9.59	60.9481	0.880372	-8.28187	4.87	2.89881	3.19	4.97682	2.96239	3.29682	50.3	1.00199	0.1	51.4033	1.02397	1.20327	66.83	0.969253	-2.12	68.2958	0.990513	-0.654163	4.07	1.02519	0.1	4.15927	1.04768	0.189271	5.5	0.901639	-0.6	5.62064	0.921416	-0.479364	7.656	0.915899	-0.703	7.82393	0.935988	-0.535075	0.651	1.78356
RSA	1	pre-test	46.3	14.82		65.16	1	0	65.16	1	0	1.86	1	0	1.86	1	0	52.2	1	0	52.2	1	0	68.98	1	0	68.98	1	0	3.84	1	0	3.84	1	0	4	1	0	4	1	0	7.695	1	0	7.695	1	0	0.18	1
RSA	1	post-test	50.5	16.11	-15.2024	58.93	0.904389	-6.23	49.9712	0.7669	-15.1888	0	0	-1.86	0	0	-1.86	56.2	1.07663	4	47.6563	0.912955	-4.54375	74.28	1.07683	5.3	62.9877	0.913129	-5.99234	5.22	1.35938	1.38	4.42643	1.15272	0.586435	24	6	20	20.3514	5.08786	16.3514	7.016	0.911761	-0.679	5.9494	0.773151	-1.7456	0.138	0.766667
RSA	1	recovery	48.9	15.79	-10.6874	76.92	1.18048	11.76	68.6992	1.05432	3.53924	0	0	-1.86	0	0	-1.86	52.3	1.00192	0.1	46.7105	0.894837	-5.48951	69.02	1.00058	0.04	61.6436	0.893644	-7.33645	4.37	1.13802	0.53	3.90296	1.0164	0.0629602	2.8	0.7	-1.2	2.50075	0.625188	-1.49925	8.005	1.04029	0.31	7.14947	0.929106	-0.545527	0.401	2.22778
RSA	1	pre-test	47.2	15.47		101.52	1	0	101.52	1	0	9.25	1	0	9.25	1	0	55.7	1	0	55.7	1	0	73.14	1	0	73.14	1	0	5.2	1	0	5.2	1	0	5	1	0	5	1	0	6.401	1	0	6.401	1	0	0.24	1
RSA	1	post-test	50	16.43	-10.8361	113.45	1.11751	11.93	101.156	0.996418	-0.363608	7.02	0.758919	-2.23	6.2593	0.676681	-2.9907	58.7	1.05386	3	52.3392	0.939662	-3.36082	79.52	1.08723	6.38	70.9031	0.969416	-2.2369	7.86	1.51154	2.66	7.00828	1.34775	1.80828	18.5	3.7	13.5	16.4953	3.29906	11.4953	7.427	1.16029	1.026	6.6222	1.03456	0.221199	0.099	0.4125
RSA	1	recovery	47.4	15.47	-0.378788	103.37	1.01822	1.85	102.978	1.01437	1.45845	6.11	0.660541	-3.14	6.08686	0.658038	-3.16314	53.4	0.958707	-2.3	53.1977	0.955076	-2.50227	71.15	0.972792	-1.99	70.8805	0.969107	-2.25951	4.84	0.930769	-0.36	4.82167	0.927244	-0.378333	3.9	0.78	-1.1	3.88523	0.777045	-1.11477	9.894	1.5457	3.493	9.85652	1.53984	3.45552	0.418	1.74167
RSA	1	pre-test	45.5	14.82		108.23	1	0	108.23	1	0	6.29	1	0	6.29	1	0	53.6	1	0	53.6	1	0	73.41	1	0	73.41	1	0	1.37	1	0	1.37	1	0	6.3	1	0	6.3	1	0	11.625	1	0	11.625	1	0	0.372	1
RSA	1	post-test	47.3	15.31	-6.39757	137.9	1.27414	29.67	129.078	1.19262	20.8478	6.15	0.977742	-0.14	5.75655	0.915191	-0.533451	56.9	1.06157	3.3	53.2598	0.993653	-0.340217	76.72	1.04509	3.31	71.8118	0.978229	-1.59822	1.73	1.26277	0.36	1.61932	1.18199	0.249322	25.5	4.04762	19.2	23.8686	3.78867	17.5686	10.609	0.912602	-1.016	9.93028	0.854218	-1.69472	0.36	0.967742
RSA	1	recovery	44.2	13.21	14.8638	96.73	0.893745	-11.5	111.108	1.02659	2.87773	6.57	1.04452	0.28	7.54655	1.19977	1.25655	53.6	1	0	61.567	1.14864	7.96698	76.1	1.03664	2.69	87.4113	1.19073	14.0013	1.78	1.29927	0.41	2.04458	1.49239	0.674575	26.5	4.20635	20.2	30.4389	4.83157	24.1389	10.044	0.864	-1.581	11.5369	0.992423	-0.0880825	0.733	1.97043
RSA	1	pre-test	45.6	14.34		92.95	1	0	92.95	1	0	10.18	1	0	10.18	1	0	53.4	1	0	53.4	1	0	71.49	1	0	71.49	1	0	3.93	1	0	3.93	1	0	6.9	1	0	6.9	1	0	4.584	1	0	4.584	1	0	0.228	1
RSA	1	post-test	46.1	14.82	-4.12822	97.56	1.0496	4.61	93.5325	1.00627	0.582513	9.31	0.914538	-0.87	8.92566	0.876784	-1.25434	54.6	1.02247	1.2	52.346	0.980262	-1.05401	72.07	1.00811	0.58	69.0948	0.966496	-2.3952	2.22	0.564885	-1.71	2.12835	0.541566	-1.80165	21.1	3.05797	14.2	20.2289	2.93173	13.3289	4.455	0.971859	-0.129	4.27109	0.931738	-0.312912	0.254	1.11404
RSA	1	recovery	43.9	14.02	5.47878	91.53	0.984723	-1.42	96.5447	1.03867	3.59473	10.88	1.06876	0.7	11.4761	1.12732	1.29609	47	0.88015	-6.4	49.575	0.928371	-3.82497	64.52	0.902504	-6.97	68.0549	0.95195	-3.43509	1.83	0.465649	-2.1	1.93026	0.491161	-1.99974	4.6	0.666667	-2.3	4.85202	0.703192	-2.04798	4.734	1.03272	0.15	4.99337	1.0893	0.409365	0.463	2.0307
RSA	1	pre-test	50.8	15.47		62.35	1	0	62.35	1	0	7.41	1	0	7.41	1	0	52.2	1	0	52.2	1	0	68.8	1	0	68.8	1	0	5.69	1	0	5.69	1	0	6.4	1	0	6.4	1	0	5.494	1	0	5.494	1	0	0.097	1
RSA	1	post-test	51.9	16.27	-7.04286	64.78	1.03897	2.43	60.2176	0.9658	-2.13237	7.98	1.07692	0.57	7.41798	1.00108	0.00797945	52.8	1.01149	0.6	49.0814	0.940256	-3.11863	68.95	1.00218	0.15	64.0939	0.931598	-4.70605	6.16	1.0826	0.47	5.72616	1.00635	0.0361596	20.8	3.25	14.4	19.3351	3.02111	12.9351	6.081	1.10684	0.587	5.65272	1.02889	0.158723	0.116	1.19588
RSA	1	recovery	48.8	15.31	5.15259	68.33	1.09591	5.98	71.8508	1.15238	9.50077	7.75	1.04588	0.34	8.14933	1.09977	0.739326	47.7	0.913793	-4.5	50.1578	0.960877	-2.04221	65.43	0.951017	-3.37	68.8013	1.00002	0.00134075	3.57	0.627417	-2.12	3.75395	0.659745	-1.93605	5.4	0.84375	-1	5.67824	0.887225	-0.72176	7.685	1.3988	2.191	8.08098	1.47087	2.58698	0.092	0.948454
RSA	1	pre-test	43.9	13.53		125	1	0	125	1	0	5.72	1	0	5.72	1	0	55.6	1	0	55.6	1	0	70.1	1	0	70.1	1	0	3.31	1	0	3.31	1	0	5.3	1	0	5.3	1	0	7.495	1	0	7.495	1	0	0.017	1
RSA	1	post-test	44.9	14.82	-10.3318	126.08	1.00864	1.08	113.054	0.904429	-11.9464	1.38	0.241259	-4.34	1.23742	0.216332	-4.48258	56.5	1.01619	0.9	50.6625	0.911196	-4.93748	70.88	1.01113	0.78	63.5568	0.906659	-6.5432	4.96	1.49849	1.65	4.44754	1.34367	1.13754	25	4.71698	19.7	22.417	4.22963	17.117	10.286	1.37238	2.791	9.22327	1.23059	1.72827	0.056	3.29412
RSA	1	recovery	42.3	14.02	-0.742637	103.93	0.83144	-21.07	103.158	0.825265	-21.8418	0.84	0.146853	-4.88	0.833762	0.145763	-4.88624	49.4	0.888489	-6.2	49.0331	0.881891	-6.56686	66.02	0.941797	-4.08	65.5297	0.934803	-4.57029	2.18	0.65861	-1.13	2.16381	0.653719	-1.14619	6.7	1.26415	1.4	6.65024	1.25476	1.35024	11.476	1.53115	3.981	11.3908	1.51978	3.89578	0.382	22.4706
RSA	2	pre-test	48.1	14.98		99.34	1	0	99.34	1	0	18.44	1	0	18.44	1	0	51.8	1	0	51.8	1	0	73.18	1	0	73.18	1	0	5.92	1	0	5.92	1	0	8.3	1	0	8.3	1	0	12.099	1	0	12.099	1	0	0.475	1
RSA	2	post-test	52.2	16.6	-16.8879	102.42	1.031	3.08	85.1234	0.85689	-14.2166	14.73	0.798807	-3.71	12.2424	0.663905	-6.19759	53.6	1.03475	1.8	44.5481	0.860002	-7.25191	74.15	1.01325	0.97	61.6276	0.842138	-11.5524	7.33	1.23818	1.41	6.09212	1.02907	0.172117	24.6	2.96386	16.3	20.4456	2.46332	12.1456	9.978	0.824696	-2.121	8.29293	0.685422	-3.80607	0.632	1.33053
RSA	2	recovery	48.9	15.95	-7.52919	98.74	0.99396	-0.6	91.3057	0.919123	-8.03432	18.46	1.00108	0.02	17.0701	0.925711	-1.36989	47.5	0.916988	-4.3	43.9236	0.847947	-7.87636	68.25	0.932632	-4.93	63.1113	0.862412	-10.0687	5.05	0.853041	-0.87	4.66978	0.788814	-1.25022	6.2	0.746988	-2.1	5.73319	0.690746	-2.56681	9.159	0.757005	-2.94	8.4694	0.700008	-3.6296	0.365	0.768421
RSA	2	pre-test	43.8	14.02		106.26	1	0	106.26	1	0	12.09	1	0	12.09	1	0	56.6	1	0	56.6	1	0	72.51	1	0	72.51	1	0	4.82	1	0	4.82	1	0	5.8	1	0	5.8	1	0	7.984	1	0	7.984	1	0	0.235	1
RSA	2	post-test	46.6	15.15	-12.0693	104.39	0.982402	-1.87	91.7908	0.863832	-14.4692	9.79	0.80976	-2.3	8.60841	0.712027	-3.48159	55.9	0.987633	-0.7	49.1532	0.868432	-7.44676	74.98	1.03406	2.47	65.9304	0.90926	-6.57959	6.71	1.39212	1.89	5.90015	1.2241	1.08015	23.4	4.03448	17.6	20.5758	3.54755	14.7758	6.598	0.826403	-1.386	5.80166	0.726661	-2.18234	0.154	0.655319
RSA	2	recovery	42.8	14.18	0.630932	95.43	0.89808	-10.83	96.0321	0.903746	-10.2279	12.92	1.06865	0.83	13.0015	1.07539	0.911516	48.9	0.863958	-7.7	49.2085	0.869409	-7.39147	66.54	0.917667	-5.97	66.9598	0.923456	-5.55018	4.53	0.939834	-0.29	4.55858	0.945764	-0.261419	6.4	1.10345	0.6	6.44038	1.11041	0.64038	9.287	1.1632	1.303	9.34559	1.17054	1.36159	0.325	1.38298
RSA	2	pre-test	44.8	14.18		81.08	1	0	81.08	1	0	7.99	1	0	7.99	1	0	51.9	1	0	51.9	1	0	74.28	1	0	74.28	1	0	6.97	1	0	6.97	1	0	6.8	1	0	6.8	1	0	8.265	1	0	8.265	1	0	0.265	1
RSA	2	post-test	47.2	15.31	-11.4077	92.94	1.14628	11.86	82.3377	1.01551	1.25767	8.56	1.07134	0.57	7.5835	0.949124	-0.406501	51.4	0.990366	-0.5	45.5364	0.877388	-6.36357	75.75	1.01979	1.47	67.1087	0.903455	-7.17135	6.97	1	0	6.17488	0.885923	-0.795118	23.7	3.48529	16.9	20.9964	3.0877	14.1964	9.625	1.16455	1.36	8.52701	1.0317	0.262007	0.154	0.581132
RSA	2	recovery	42.1	14.02	6.08835	71.43	0.880982	-9.65	75.7789	0.934619	-5.30109	5.45	0.682103	-2.54	5.78182	0.723631	-2.20818	46.9	0.903661	-5	49.7554	0.958679	-2.14456	70.84	0.953689	-3.44	75.153	1.01175	0.872989	5.81	0.833572	-1.16	6.16373	0.884323	-0.806267	5.1	0.75	-1.7	5.41051	0.795663	-1.38949	8.789	1.0634	0.524	9.32411	1.12814	1.05911	0.235	0.886792
RSA	2	pre-test	47.1	15.15		81.04	1	0	81.04	1	0	4.23	1	0	4.23	1	0	55.7	1	0	55.7	1	0	68.56	1	0	68.56	1	0	1.73	1	0	1.73	1	0	6.9	1	0	6.9	1	0	6.548	1	0	6.548	1	0	0.189	1
RSA	2	post-test	48.2	16.11	-7.91451	94	1.15992	12.96	86.5604	1.06812	5.52036	2.13	0.503546	-2.1	1.96142	0.463693	-2.26858	52.4	0.940754	-3.3	48.2528	0.866298	-7.44721	70.67	1.03078	2.11	65.0768	0.949195	-3.48319	3.18	1.83815	1.45	2.92832	1.69267	1.19832	19.8	2.86957	12.9	18.2329	2.64245	11.3329	7.256	1.10812	0.708	6.68172	1.02042	0.133723	0.098	0.518519
RSA	2	recovery	44.4	14.98	6.29674	82.32	1.01579	1.28	87.5035	1.07976	6.46348	1.48	0.349882	-2.75	1.57319	0.371913	-2.65681	47.9	0.859964	-7.8	50.9161	0.914114	-4.78386	67.08	0.978413	-1.48	71.3039	1.04002	2.74385	0	0	-1.73	0	0	-1.73	6.8	0.985507	-0.1	7.22818	1.04756	0.328178	8.954	1.36744	2.406	9.51781	1.45354	2.96981	0.197	1.04233
RSA	2	pre-test	45.5	14.5		78.27	1	0	78.27	1	0	9.83	1	0	9.83	1	0	54.6	1	0	54.6	1	0	70.97	1	0	70.97	1	0	6.41	1	0	6.41	1	0	7.9	1	0	7.9	1	0	7.894	1	0	7.894	1	0	0.211	1
RSA	2	post-test	48.3	15.63	-11.9959	96.46	1.2324	18.19	84.8888	1.08456	6.61879	8.97	0.912513	-0.86	7.89397	0.803049	-1.93603	53.5	0.979853	-1.1	47.0822	0.862312	-7.51779	70.86	0.99845	-0.11	62.3597	0.878677	-8.61027	6.7	1.04524	0.29	5.89628	0.919856	-0.513723	29.8	3.77215	21.9	26.2252	3.31965	18.3252	8.154	1.03294	0.26	7.17586	0.909027	-0.718143	0.158	0.748815
RSA	2	recovery	44.6	14.82	-0.543525	85.56	1.09314	7.29	85.095	1.0872	6.82496	10.08	1.02543	0.25	10.0252	1.01986	0.195213	48.1	0.880952	-6.5	47.8386	0.876164	-6.76144	65.7	0.925743	-5.27	65.3429	0.920712	-5.6271	4.72	0.736349	-1.69	4.69435	0.732347	-1.71565	8	1.01266	0.1	7.95652	1.00715	0.056518	9.052	1.14669	1.158	9.0028	1.14046	1.1088	0.231	1.09479
RSA	2	pre-test	48.5	15.47		56.13	1	0	56.13	1	0	11.78	1	0	11.78	1	0	54.2	1	0	54.2	1	0	68.83	1	0	68.83	1	0	8.68	1	0	8.68	1	0	7.7	1	0	7.7	1	0	6.587	1	0	6.587	1	0	0.345	1
RSA	2	post-test	51	16.43	-10.4137	75.28	1.34117	19.15	67.4406	1.20151	11.3106	11.16	0.947368	-0.62	9.99783	0.848712	-1.78217	52	0.95941	-2.2	46.5849	0.8595	-7.61512	70.51	1.02441	1.68	63.1673	0.917729	-5.6627	7.82	0.900922	-0.86	7.00565	0.807102	-1.67435	19.4	2.51948	11.7	17.3797	2.25711	9.67974	9.687	1.47062	3.1	8.67822	1.31748	2.09122	0.364	1.05507
RSA	2	recovery	47.5	15.47	1.94175	59.62	1.06218	3.49	60.7777	1.0828	4.64767	12.82	1.08829	1.04	13.0689	1.10942	1.28893	48.3	0.891144	-5.9	49.2379	0.908448	-4.96214	65.61	0.953218	-3.22	66.884	0.971727	-1.94602	7.11	0.819124	-1.57	7.24806	0.83503	-1.43194	4.8	0.623377	-2.9	4.8932	0.635481	-2.8068	6.478	0.983452	-0.109	6.60379	1.00255	0.0167864	0.321	0.930435
RSA	2	pre-test	43	13.7		60.8	1	0	60.8	1	0	1.95	1	0	1.95	1	0	52.7	1	0	52.7	1	0	70.62	1	0	70.62	1	0	5.07	1	0	5.07	1	0	5.3	1	0	5.3	1	0	5.642	1	0	5.642	1	0	0.298	1
RSA	2	post-test	43.9	14.02	-3.82536	67.64	1.1125	6.84	65.0525	1.06994	4.25252	0	0	-1.95	0	0	-1.95	50.7	0.962049	-2	48.7605	0.925247	-3.93946	70.79	1.00241	0.17	68.082	0.964062	-2.53797	5.78	1.14004	0.71	5.55889	1.09643	0.488894	21.8	4.11321	16.5	20.9661	3.95586	15.6661	6.245	1.10688	0.603	6.00611	1.06453	0.364106	0.298	1
RSA	2	recovery	42.3	13.86	0.0594922	61.39	1.0097	0.59	61.4265	1.0103	0.626522	1.56	0.8	-0.39	1.56093	0.800476	-0.389072	47.4	0.899431	-5.3	47.4282	0.899966	-5.2718	64.33	0.910932	-6.29	64.3683	0.911474	-6.25173	5.51	1.08679	0.44	5.51328	1.08743	0.443278	4.2	0.792453	-1.1	4.2025	0.792924	-1.0975	5.846	1.03616	0.204	5.84948	1.03677	0.207478	0.278	0.932886
RSA	2	pre-test	43.2	14.18		99.72	1	0	99.72	1	0	12.26	1	0	12.26	1	0	53.2	1	0	53.2	1	0	71.52	1	0	71.52	1	0	4.96	1	0	4.96	1	0	5.7	1	0	5.7	1	0	7.215	1	0	7.215	1	0	0.278	1
RSA	2	post-test	44.9	14.66	-6.16918	97.87	0.981448	-1.85	91.8322	0.920901	-7.88777	11.64	0.949429	-0.62	10.9219	0.890857	-1.33809	50.6	0.951128	-2.6	47.4784	0.892451	-5.7216	71.39	0.998182	-0.13	66.9858	0.936603	-4.53418	6.95	1.40121	1.99	6.52124	1.31477	1.56124	19.6	3.4386	13.9	18.3908	3.22646	12.6908	6.58	0.911989	-0.635	6.17407	0.855727	-1.04093	0.321	1.15468
RSA	2	recovery	42.9	14.18	0.528169	88.14	0.883875	-11.58	88.6055	0.888543	-11.1145	10.66	0.869494	-1.6	10.7163	0.874087	-1.5437	47.4	0.890977	-5.8	47.6504	0.895683	-5.54965	68.56	0.958613	-2.96	68.9221	0.963676	-2.59789	6.31	1.27218	1.35	6.34333	1.2789	1.38333	5.2	0.912281	-0.5	5.22746	0.917099	-0.472535	7.23	1.00208	0.015	7.26819	1.00737	0.0531866	0.311	1.11871
RSA	1	pre-test	45.9	14.82		86	1	0	86	1	0	8.53	1	0	8.53	1	0	55.7	1	0	55.7	1	0	67.66	1	0	67.66	1	0	4	1	0	4	1	0	7	1	0	7	1	0	9.874	1	0	9.874	1	0	0.187	1
RSA	1	post-test	46.9	15.15	-3.98638	87.71	1.01988	1.71	84.2135	0.979227	-1.78646	7.24	0.848769	-1.29	6.95139	0.814934	-1.57861	52.7	0.94614	-3	50.5992	0.908423	-5.10082	68.67	1.01493	1.01	65.9326	0.974469	-1.72745	4.72	1.18	0.72	4.53184	1.13296	0.531843	16.9	2.41429	9.9	16.2263	2.31804	9.2263	8.456	0.856391	-1.418	8.11891	0.822252	-1.75509	0.065	0.347594
RSA	1	recovery	44.6	14.5	4.66288	91.03	1.05849	5.03	95.2746	1.10784	9.27462	3.55	0.416178	-4.98	3.71553	0.435584	-4.81447	48.8	0.876122	-6.9	51.0755	0.916975	-4.62451	63.42	0.937334	-4.24	66.3772	0.981041	-1.2828	7.04	1.76	3.04	7.36827	1.84207	3.36827	5	0.714286	-2	5.23314	0.747592	-1.76686	9.245	0.936297	-0.629	9.67608	0.979956	-0.197916	0.215	1.14973
RSA	1	pre-test	49.4	15.79		81.58	1	0	81.58	1	0	4.78	1	0	4.78	1	0	52.1	1	0	52.1	1	0	67.81	1	0	67.81	1	0	7.47	1	0	7.47	1	0	6.4	1	0	6.4	1	0	6.587	1	0	6.587	1	0	0.145	1
RSA	1	post-test	52.2	16.44	-9.26858	100.41	1.23082	18.83	91.1034	1.11674	9.52342	3.53	0.738494	-1.25	3.20282	0.670046	-1.57718	52.6	1.0096	0.5	47.7247	0.916022	-4.37527	73.72	1.08716	5.91	66.8872	0.986391	-0.922799	7.83	1.04819	0.36	7.10427	0.95104	-0.36573	22.4	3.5	16	20.3238	3.1756	13.9238	5.486	0.832853	-1.101	4.97753	0.755659	-1.60947	0.214	1.47586
RSA	1	recovery	40.9	12.41	48.6098	72.84	0.892866	-8.74	108.247	1.32689	26.6673	0	0	-4.78	0	0	-4.78	52.1	1	0	77.4257	1.4861	25.3257	73.2	1.07949	5.39	108.782	1.60422	40.9723	6.58	0.880857	-0.89	9.77852	1.30904	2.30852	5.4	0.84375	-1	8.02493	1.25389	1.62493	7.025	1.06649	0.438	10.4398	1.58492	3.85284	0.205	1.41379
RSA	2	pre-test	46	14.82		73.27	1	0	73.27	1	0	0.47	1	0	0.47	1	0	56.6	1	0	56.6	1	0	75.7	1	0	75.7	1	0	4.78	1	0	4.78	1	0	6.5	1	0	6.5	1	0	7.251	1	0	7.251	1	0	0.365	1
RSA	2	post-test	46.2	14.66	0.716993	87.02	1.18766	13.75	87.6439	1.19618	14.3739	0	0	-0.47	0	0	-0.47	53.2	0.939929	-3.4	53.5814	0.946669	-3.01856	73.33	0.968692	-2.37	73.8558	0.975638	-1.84423	4.31	0.901674	-0.47	4.3409	0.908139	-0.439098	23.5	3.61538	17	23.6685	3.64131	17.1685	7.028	0.969246	-0.223	7.07839	0.976195	-0.17261	0.452	1.23836
RSA	2	recovery	41.5	13.21	21.5367	63.6	0.868022	-9.67	77.2974	1.05497	4.02735	9.19	19.5532	8.72	11.1692	23.7643	10.6992	47.9	0.84629	-8.7	58.2161	1.02855	1.61609	65.96	0.871334	-9.74	80.1656	1.05899	4.46562	8.01	1.67573	3.23	9.73509	2.03663	4.95509	4.9	0.753846	-1.6	5.9553	0.9162	-0.544701	7.15	0.986071	-0.101	8.68988	1.19844	1.43888	0.312	0.854795
RSA	1	pre-test	49.2	15.63		57	1	0	57	1	0	8.88	1	0	8.88	1	0	55.1	1	0	55.1	1	0	70.21	1	0	70.21	1	0	3.9	1	0	3.9	1	0	5.7	1	0	5.7	1	0	6.589	1	0	6.589	1	0	0.564	1
RSA	1	post-test	51.1	16.6	-9.36498	77.09	1.35246	20.09	69.8705	1.2258	12.8705	5.7	0.641892	-3.18	5.1662	0.581779	-3.7138	53.9	0.978221	-1.2	48.8523	0.886611	-6.24772	73.05	1.04045	2.84	66.2089	0.943012	-4.00112	5.01	1.28462	1.11	4.54081	1.16431	0.640815	20.1	3.52632	14.4	18.2176	3.19608	12.5176	6.586	0.999545	-0.003	5.96922	0.905938	-0.619778	0.456	0.808511
RSA	1	recovery	47.5	15.31	5.50654	90.7	1.59123	33.7	95.6944	1.67885	38.6944	0	0	-8.88	0	0	-8.88	48.3	0.876588	-6.8	50.9597	0.924858	-4.14034	65.84	0.937758	-4.37	69.4655	0.989396	-0.744494	10.28	2.6359	6.38	10.8461	2.78104	6.94607	3.6	0.631579	-2.1	3.79824	0.666357	-1.90176	5.247	0.796327	-1.342	5.53593	0.840177	-1.05307	0.321	0.569149
RSA	1	pre-test	39.4	12.73		138.7	1	0	138.7	1	0	0.32	1	0	0.32	1	0	48.7	1	0	48.7	1	0	64.52	1	0	64.52	1	0	2.93	1	0	2.93	1	0	6.2	1	0	6.2	1	0	5.789	1	0	5.789	1	0	0.258	1
RSA	1	post-test	43.1	13.7	-12.7536	133.82	0.964816	-4.88	116.753	0.841767	-21.9469	0.04	0.125	-0.28	0.0348986	0.109058	-0.285101	49.3	1.01232	0.6	43.0125	0.883213	-5.68753	67.52	1.0465	3	58.9088	0.913031	-5.61124	4.57	1.55973	1.64	3.98716	1.36081	1.05716	25.1	4.04839	18.9	21.8988	3.53207	15.6988	6.025	1.04077	0.236	5.2566	0.908032	-0.532405	0.187	0.724806
RSA	1	recovery	38.9	12.25	4.77578	78.1	0.563086	-60.6	81.8299	0.589978	-56.8701	8.52	26.625	8.2	8.9269	27.8966	8.6069	43	0.882957	-5.7	45.0536	0.925125	-3.64641	61.58	0.954433	-2.94	64.5209	1.00001	0.000925089	8.53	2.91126	5.6	8.93737	3.0503	6.00737	6.1	0.983871	-0.1	6.39132	1.03086	0.191323	5.987	1.0342	0.198	6.27293	1.08359	0.483926	0.231	0.895349
RSA	1	pre-test	34	14.66		82.92	1	0	82.92	1	0	6.79	1	0	6.79	1	0	52.7	1	0	52.7	1	0	65.11	1	0	65.11	1	0	3.88	1	0	3.88	1	0	5.9	1	0	5.9	1	0	9.087	1	0	9.087	1	0	0.315	1
RSA	1	post-test	48.4	15.95	-28.1414	85.72	1.03377	2.8	61.5972	0.742851	-21.3228	4.32	0.63623	-2.47	3.10429	0.457186	-3.68571	55	1.04364	2.3	39.5223	0.749948	-13.1777	73.84	1.13408	8.73	53.0604	0.814935	-12.0496	5.33	1.37371	1.45	3.83007	0.98713	-0.049934	18.1	3.0678	12.2	13.0064	2.20448	7.10642	8.987	0.988995	-0.1	6.45794	0.710679	-2.62906	0.456	1.44762
RSA	1	recovery	44.1	14.66	-15.303	74.16	0.894356	-8.76	62.8113	0.757492	-20.1087	9.18	1.35199	2.39	7.77518	1.14509	0.985182	47.7	0.905123	-5	40.4005	0.766612	-12.2995	64.02	0.983259	-1.09	54.223	0.832791	-10.887	9.04	2.3299	5.16	7.65661	1.97335	3.77661	3.6	0.610169	-2.3	3.04909	0.516795	-2.85091	7.859	0.864862	-1.228	6.65633	0.732512	-2.43067	0.402	1.27619
RSA	1	pre-test	48.2	15.79		77.76	1	0	77.76	1	0	7.84	1	0	7.84	1	0	53	1	0	53	1	0	64.98	1	0	64.98	1	0	4.5	1	0	4.5	1	0	6	1	0	6	1	0	6.058	1	0	6.058	1	0	0.562	1
RSA	1	post-test	48.7	16.27	-3.88699	50.66	0.651492	-27.1	48.6909	0.626168	-29.0691	6.64	0.846939	-1.2	6.3819	0.814018	-1.4581	50.3	0.949057	-2.7	48.3448	0.912167	-4.65516	69.5	1.06956	4.52	66.7985	1.02799	1.81854	9.78	2.17333	5.28	9.39985	2.08886	4.89985	5	0.833333	-1	4.80565	0.800942	-1.19435	5.987	0.98828	-0.071	5.75429	0.949866	-0.303714	0.498	0.886121
RSA	1	recovery	46.5	15.47	5.41826	78.22	1.00592	0.46	82.4582	1.06042	4.69816	6.57	0.83801	-1.27	6.92598	0.883416	-0.91402	46.5	0.877358	-6.5	49.0195	0.924896	-3.98051	65.35	1.00569	0.37	68.8908	1.06019	3.91083	13.08	2.90667	8.58	13.7887	3.06416	9.28871	4.7	0.783333	-1.3	4.95466	0.825776	-1.04534	6.125	1.01106	0.067	6.45687	1.06584	0.398868	0.561	0.998221
RSA	1	pre-test	48.8	15.47		56.4	1	0	56.4	1	0	2.36	1	0	2.36	1	0	51.5	1	0	51.5	1	0	72.12	1	0	72.12	1	0	4.52	1	0	4.52	1	0	2.4	1	0	2.4	1	0	8.245	1	0	8.245	1	0	0.321	1
RSA	1	post-test	48.1	15.31	2.42654	62.1	1.10106	5.7	63.6069	1.12778	7.20688	0.458	0.194068	-1.902	0.469114	0.198777	-1.89089	52.5	1.01942	1	53.7739	1.04415	2.27394	73.36	1.01719	1.24	75.1401	1.04188	3.02011	5.68	1.25664	1.16	5.81783	1.28713	1.29783	9.1	3.79167	6.7	9.32082	3.88367	6.92082	8.658	1.05009	0.413	8.86809	1.07557	0.62309	0.362	1.12773
RSA	1	recovery	40.1	14.66	23.4563	59.1	1.04787	2.7	72.9627	1.29366	16.5627	0.47	0.199153	-1.89	0.580245	0.245866	-1.77976	50	0.970874	-1.5	61.7281	1.1986	10.2281	70.18	0.9731	-1.94	86.6416	1.20135	14.5216	4.2	0.929204	-0.32	5.18516	1.14716	0.665164	2.7	1.125	0.3	3.33332	1.38888	0.93332	8.098	0.982171	-0.147	9.99749	1.21255	1.75249	0.345	1.07477
RSA	1	pre-test	42.6	13.86		64.23	1	0	64.23	1	0	1.25	1	0	1.25	1	0	47.9	1	0	47.9	1	0	66.43	1	0	66.43	1	0	3.25	1	0	3.25	1	0	2.8	1	0	2.8	1	0	5.648	1	0	5.648	1	0	0.254	1
RSA	1	post-test	46.1	14.66	-11.2218	59.3	0.923245	-4.93	52.6454	0.81964	-11.5846	0.23	0.184	-1.02	0.20419	0.163352	-1.04581	52.8	1.1023	4.9	46.8749	0.978598	-1.02513	71.05	1.06955	4.62	63.0769	0.949524	-3.35312	6.54	2.01231	3.29	5.80609	1.78649	2.55609	9.5	3.39286	6.7	8.43393	3.01212	5.63393	4.587	0.812146	-1.061	4.07225	0.721008	-1.57575	0.225	0.885827
RSA	1	recovery	41.8	13.37	5.10973	60.1	0.9357	-4.13	63.1709	0.983512	-1.05905	0.89	0.712	-0.36	0.935477	0.748381	-0.314523	49.2	1.02714	1.3	51.714	1.07962	3.81399	66.33	0.998495	-0.1	69.7193	1.04952	3.28928	2.36	0.726154	-0.89	2.48059	0.763258	-0.76941	2.1	0.75	-0.7	2.2073	0.788323	-0.592696	5.025	0.889695	-0.623	5.28176	0.935156	-0.366236	0.236	0.929134
RSA	1	pre-test	45.1	14.5		84	1	0	84	1	0	8.79	1	0	8.79	1	0	45.2	1	0	45.2	1	0	69.48	1	0	69.48	1	0	7.05	1	0	7.05	1	0	2.9	1	0	2.9	1	0	4.268	1	0	4.268	1	0	0.188	1
RSA	1	post-test	46.8	15.15	-7.25411	84.56	1.00667	0.56	78.4259	0.933642	-5.57408	6.54	0.744027	-2.25	6.06558	0.690055	-2.72442	50.1	1.10841	4.9	46.4657	1.028	1.26569	74.57	1.07326	5.09	69.1606	0.995403	-0.319392	8.97	1.27234	1.92	8.31931	1.18004	1.26931	8.5	2.93103	5.6	7.8834	2.71841	4.9834	4.054	0.949859	-0.214	3.75992	0.880956	-0.508082	0.205	1.09043
RSA	1	recovery	40.7	13.53	15.7584	88.23	1.05036	4.23	102.134	1.21588	18.1336	4.5	0.511945	-4.29	5.20913	0.59262	-3.58087	46.3	1.02434	1.1	53.5961	1.18576	8.39614	68.56	0.986759	-0.92	79.364	1.14226	9.88397	6.5	0.921986	-0.55	7.5243	1.06728	0.474297	1.7	0.586207	-1.2	1.96789	0.678584	-0.932107	5.02	1.17619	0.752	5.81107	1.36154	1.54307	0.198	1.05319
RSA	1	pre-test	43.4	14.34		79.25	1	0	79.25	1	0	6.57	1	0	6.57	1	0	50.3	1	0	50.3	1	0	70.3	1	0	70.3	1	0	2.36	1	0	2.36	1	0	2.9	1	0	2.9	1	0	7.248	1	0	7.248	1	0	0.271	1
RSA	1	post-test	45.1	14.98	-7.14757	65.43	0.825615	-13.82	60.7533	0.766604	-18.4967	2.3	0.350076	-4.27	2.13561	0.325054	-4.43439	54.6	1.08549	4.3	50.6974	1.0079	0.397424	75.62	1.07568	5.32	70.215	0.998791	-0.0849961	6.54	2.77119	4.18	6.07255	2.57311	3.71255	11.8	4.06897	8.9	10.9566	3.77813	8.05659	8.065	1.11272	0.817	7.48855	1.03319	0.240548	0.321	1.1845
RSA	1	recovery	43.6	13.05	9.49677	71.23	0.898801	-8.02	77.9946	0.984158	-1.25545	4.56	0.694064	-2.01	4.99305	0.759978	-1.57695	54.6	1.08549	4.3	59.7852	1.18857	9.48524	74.5	1.05974	4.2	81.5751	1.16039	11.2751	2.41	1.02119	0.05	2.63887	1.11817	0.278872	2.9	1	0	3.17541	1.09497	0.275406	8.025	1.1072	0.777	8.78712	1.21235	1.53912	0.298	1.09963
RSA	1	pre-test	42.7	13.53		89.62	1	0	89.62	1	0	3.25	1	0	3.25	1	0	47.5	1	0	47.5	1	0	70.01	1	0	70.01	1	0	2.21	1	0	2.21	1	0	2.9	1	0	2.9	1	0	6.587	1	0	6.587	1	0	0.321	1
RSA	1	post-test	45	14.5	-10.4351	65.23	0.727851	-24.39	58.4232	0.651899	-31.1968	1.25	0.384615	-2	1.11956	0.34448	-2.13044	51.2	1.07789	3.7	45.8572	0.965415	-1.64277	75.11	1.07285	5.1	67.2722	0.960894	-2.7378	4.56	2.06335	2.35	4.08416	1.84804	1.87416	10.1	3.48276	7.2	9.04606	3.11933	6.14606	5.487	0.833004	-1.1	4.91443	0.74608	-1.67257	0.331	1.03115
RSA	1	recovery	40.7	13.05	7.29694	85.6	0.955144	-4.02	91.8462	1.02484	2.22618	2.25	0.692308	-1	2.41418	0.742825	-0.835819	46.1	0.970526	-1.4	49.4639	1.04135	1.96389	66.07	0.943722	-3.94	70.8911	1.01259	0.881091	2.36	1.06787	0.15	2.53221	1.1458	0.322208	2.2	0.758621	-0.7	2.36053	0.813977	-0.539467	6.58	0.998937	-0.007	7.06014	1.07183	0.473139	0.321	1
RSA	1	pre-test	43.3	14.34		74.56	1	0	74.56	1	0	2.13	1	0	2.13	1	0	47.6	1	0	47.6	1	0	76.57	1	0	76.57	1	0	3.87	1	0	3.87	1	0	3.2	1	0	3.2	1	0	9.028	1	0	9.028	1	0	0.287	1
RSA	1	post-test	43.5	14.18	0.771636	65.23	0.874866	-9.33	65.7333	0.881617	-8.82666	0.45	0.211268	-1.68	0.453472	0.212898	-1.67653	50.2	1.05462	2.6	50.5874	1.06276	2.98736	74.68	0.975317	-1.89	75.2563	0.982843	-1.31374	9.87	2.55039	6	9.94616	2.57007	6.07616	10.6	3.3125	7.4	10.6818	3.33806	7.48179	8.754	0.96965	-0.274	8.82155	0.977132	-0.206451	0.245	0.853659
RSA	1	recovery	40.1	13.21	14.6806	77.54	1.03997	2.98	88.9234	1.19264	14.3634	2.31	1.08451	0.18	2.64912	1.24372	0.519123	47.6	1	0	54.588	1.14681	6.98798	67.19	0.877498	-9.38	77.0539	1.00632	0.48392	3.11	0.803618	-0.76	3.56657	0.921594	-0.303432	3	0.9375	-0.2	3.44042	1.07513	0.240419	9.45	1.04674	0.422	10.8373	1.20041	1.80932	0.265	0.923345
RSA	1	pre-test	46.9	15.63		98.26	1	0	98.26	1	0	1.25	1	0	1.25	1	0	49.8	1	0	49.8	1	0	67.67	1	0	67.67	1	0	4.56	1	0	4.56	1	0	3	1	0	3	1	0	8.265	1	0	8.265	1	0	0.459	1
RSA	1	post-test	49.5	15.79	-5.86011	102.2	1.0401	3.94	96.211	0.979147	-2.04903	0.036	0.0288	-1.214	0.0338904	0.0271123	-1.21611	52.6	1.05622	2.8	49.5176	0.994329	-0.282416	70.52	1.04212	2.85	66.3875	0.981047	-1.28255	8.45	1.85307	3.89	7.95482	1.74448	3.39482	10.4	3.46667	7.4	9.79055	3.26352	6.79055	6.54	0.791289	-1.725	6.15675	0.744918	-2.10825	0.369	0.803922
RSA	1	recovery	43.8	14.34	15.359	98.5	1.00244	0.24	113.629	1.15641	15.3687	2.36	1.888	1.11	2.72247	2.17798	1.47247	48.1	0.965863	-1.7	55.4877	1.11421	5.6877	63.97	0.945323	-3.7	73.7952	1.09052	6.12518	4.01	0.879386	-0.55	4.6259	1.01445	0.0658974	1.7	0.566667	-1.3	1.9611	0.653701	-1.0389	7.28	0.880823	-0.985	8.39814	1.01611	0.133138	0.457	0.995643
RSA	1	pre-test	45.8	14.5		87.62	1	0	87.62	1	0	1.25	1	0	1.25	1	0	49.6	1	0	49.6	1	0	67.38	1	0	67.38	1	0	2.59	1	0	2.59	1	0	3.2	1	0	3.2	1	0	8.264	1	0	8.264	1	0	0.325	1
RSA	1	post-test	46.7	14.66	-2.7338	104.5	1.19265	16.88	101.643	1.16005	14.0232	0.25	0.2	-1	0.243166	0.194532	-1.00683	50.8	1.02419	1.2	49.4112	0.996194	-0.18877	70.79	1.05061	3.41	68.8547	1.02189	1.47474	6.54	2.5251	3.95	6.36121	2.45607	3.77121	12	3.75	8.8	11.6719	3.64748	8.47194	9.025	1.09209	0.761	8.77827	1.06223	0.514275	0.365	1.12308
RSA	1	recovery	42.3	13.53	14.0898	112.5	1.28395	24.88	128.351	1.46486	40.731	1.32	1.056	0.07	1.50599	1.20479	0.255985	46.4	0.935484	-3.2	52.9377	1.06729	3.33766	63.9	0.948353	-3.48	72.9034	1.08197	5.52337	2.36	0.911197	-0.23	2.69252	1.03958	0.102519	2.1	0.65625	-1.1	2.39589	0.748714	-0.804115	8.756	1.05954	0.492	9.9897	1.20882	1.7257	0.321	0.987692
RSA	1	pre-test	49.3	15.79		98.6	1	0	98.6	1	0	6.54	1	0	6.54	1	0	48.1	1	0	48.1	1	0	67.42	1	0	67.42	1	0	3.54	1	0	3.54	1	0	3	1	0	3	1	0	7.254	1	0	7.254	1	0	0.398	1
RSA	1	post-test	50.6	16.27	-5.43867	78.5	0.796146	-20.1	74.2306	0.752846	-24.3694	3.21	0.490826	-3.33	3.03542	0.464131	-3.50458	51.4	1.06861	3.3	48.6045	1.01049	0.504523	71.61	1.06215	4.19	67.7154	1.00438	0.295368	3.21	0.90678	-0.33	3.03542	0.857463	-0.504581	10	3.33333	7	9.45613	3.15204	6.45613	6.254	0.862145	-1	5.91387	0.815256	-1.34013	0.354	0.889447
RSA	1	recovery	46.7	14.98	10.8127	102.2	1.03651	3.6	113.251	1.14859	14.6506	5.46	0.834862	-1.08	6.05037	0.925134	-0.489626	50.2	1.04366	2.1	55.628	1.15651	7.52798	68.82	1.02077	1.4	76.2613	1.13114	8.84131	3.45	0.974576	-0.09	3.82304	1.07995	0.283038	2.3	0.766667	-0.7	2.54869	0.849564	-0.451308	7.459	1.02826	0.205	8.26552	1.13944	1.01152	0.456	1.14573
[truncated: 25 more columns]
