# Supplementary material for: Effect of Aerobic and Anaerobic Exercise on the Complement System of Proteins in Healthy Young Males
Source: J Clin Med. 2020 Jul 23;9(8):2357. doi: 10.3390/jcm9082357 (PMC7464301; doi:10.3390/jcm9082357)
Supplement: Supplementary file 1 [file jcm-09-02357-s001.zip › jcm-856170_TableS2.pdf]

**Table S2.** Selected biochemical variables of studied participants' blood samples.

| Variable                   |           | Younger group<br>(N = 39) |           | Older group<br>(N = 12) |           |
|----------------------------|-----------|---------------------------|-----------|-------------------------|-----------|
|                            |           | Beep test                 | RSA test  | Beep test               | RSA test  |
| Corrected TP<br>(g/L)      | pre-test  | 66.6±3.2                  | 69.9±3.2  | 66.7±3.4                | 70.0±4.9  |
|                            | post-test | 64.7±6.1                  | 67.2±4.9  | 65.2±6.0                | 65.9±3.4  |
|                            | recovery  | 68.8±6.7                  | 73.2±10.3 | 67.5±4.9                | 69.6±5.0  |
| Δ corrected TP             | Δp        | -2.0±5.4                  | -2.7±3.6  | -1.5±4.5                | -4.1±4.6  |
|                            | Δr        | 2.2±6.1                   | 3.3±10.0  | 0.8±4.4                 | -0.4±6.6  |
| Corrected<br>albumin (g/L) | pre-test  | 47.7±2.4                  | 52.0±3.3  | 47.2±1.5                | 53.2±2.5  |
|                            | post-test | 45.6±4.2                  | 49.3±3.3  | 45.7±3.3                | 48.3±2.5  |
|                            | recovery  | 49.9±4.7                  | 53.5±6.9  | 47.7±3.3                | 50.6±4.3  |
| Δ corrected<br>albumin     | Δp        | -2.1±3.8                  | -2.7±3.7  | -1.5±2.9                | -4.9±2.9  |
|                            | Δr        | 2.2±4.4                   | 1.5±7.6   | 0.5±2.7                 | -2.6±5.2  |
| Corrected<br>CRP (mg/L)    | pre-test  | 1.54±0.84                 | 3.98±1.35 | 1.39±1.09               | 5.04±1.86 |
|                            | post-test | 0.54±0.66                 | 5.34±2.12 | 1.31±0.70               | 5.19±1.33 |
|                            | recovery  | 0.65±0.87                 | 5.30±3.05 | 1.95±0.56               | 5.26±2.26 |
| Δ corrected<br>CRP         | Δp        | -0.99±0.98                | 1.36±1.83 | -0.09±0.57              | 0.16±0.95 |
|                            | Δr        | -0.89±1.15                | 1.32±2.67 | 0.56±0.78               | 0.22±1.92 |
| Corrected LA<br>(mmol/L)   | pre-test  | 3.2±0.7                   | 4.9±1.6   | 3.2±0.44                | 6.3±1.2   |
|                            | post-test | 9.2±2.4                   | 15.7±5.9  | 10.0±2.0                | 19.9±3.4  |
|                            | recovery  | 3.1±0.7                   | 5.3±5.4   | 2.9±0.6                 | 5.5±1.3   |
| Δ corrected<br>LA          | Δp        | 5.9±2.3                   | 10.8±4.9  | 6.8±2.1                 | 13.8±3.0  |
|                            | Δr        | -0.1±0.8                  | 0.4±4.9   | -0.3±0.8                | -0.9±1.0  |

The table presents mean±SD of values corrected for plasma volume loss. Beep - maximal multistage 20m shuttle run test, CRP – reactive protein C, LA – lactic acid, RSA – reaped speed ability test, TP – total protein. Δ – the difference between results: Δp = post-test – pre-test, Δr = recovery – pre-test. The analyses were performed before (baseline, pre-test) and after the effort (5 minutes post-effort and during lactate recovery time about 1 hour after the test).

It must be pointed out that this form of non-normally distributed data presentation is not suggested as it may be misleading.
