# Supplementary material for: Effect of Aerobic and Anaerobic Exercise on the Complement System of Proteins in Healthy Young Males
Source: J Clin Med. 2020 Jul 23;9(8):2357. doi: 10.3390/jcm9082357 (PMC7464301; doi:10.3390/jcm9082357)
Supplement: Supplementary file 1 [file jcm-09-02357-s001.zip › jcm-856170_TableS3.pdf]

**Table S3.** Complement variables of studied participants' blood samples.

| Variable                   |            | Younger group<br>(N = 39) |            | Older group<br>(N = 12) |            |
|----------------------------|------------|---------------------------|------------|-------------------------|------------|
|                            |            | Beep test                 | RSA test   | Beep test               | RSA test   |
| Corrected C2<br>(ng/mL)    | pre-test   | 8.86±1.38                 | 7.44±1.87  | 9.65±2.12               | 7.78±1.78  |
|                            | post-test  | 8.76±1.36                 | 6.68±2.15  | 9.54±2.92               | 7.09±1.05  |
|                            | recovery   | 10.10±1.97                | 8.10±2.05  | 11.34±1.90              | 8.06±1.26  |
| $\Delta$ corrected<br>C2   | $\Delta p$ | -0.11±1.28                | -0.76±1.13 | -0.11±2.74              | -0.69±1.62 |
|                            | $\Delta r$ | 1.24±2.20                 | 0.66±1.60  | 1.69±1.44               | 0.27±1.65  |
| Corrected C3<br>(mg/dL)    | pre-test   | 119.3±50.8                | 86.9±19.7  | 197.6±16.7              | 80.6±17.1  |
|                            | post-test  | 88.0±27.9                 | 79.5±21.6  | 98.6±32.5               | 79.7±11.9  |
|                            | recovery   | 98.4±38.7                 | 89.5±18.2  | 108.5±18.3              | 79.0±12.4  |
| $\Delta$ corrected<br>C3   | $\Delta p$ | -31.3±52.9                | -7.4±13.6  | -99.0±34.4              | -0.9±9.8   |
|                            | $\Delta r$ | -20.9±50.9                | 2.6±20.0   | -89.1±26.5              | -1.6±7.2   |
| Corrected C3a<br>(ng/mL)   | pre-test   | 0.47±0.20                 | 0.30±0.17  | 0.26±0.15               | 0.28±0.09  |
|                            | post-test  | 0.51±0.18                 | 0.26±0.14  | 0.40±0.13               | 0.24±0.14  |
|                            | recovery   | 0.33±0.17                 | 0.38±0.16  | 0.35±0.11               | 0.31±0.07  |
| $\Delta$ corrected<br>C3a  | $\Delta p$ | 0.20±0.15                 | -0.04±0.10 | 0.14±0.08               | -0.04±0.09 |
|                            | $\Delta r$ | 0.06±0.19                 | 0.07±0.20  | 0.09±0.17               | 0.03±0.10  |
| Corrected<br>iC3b (mg/mL)  | pre-test   | 0.73±0.15                 | 0.43±0.19  | 0.64±0.17               | 0.48±0.25  |
|                            | post-test  | 0.80±0.19                 | 0.36±0.19  | 0.69±0.25               | 0.42±0.23  |
|                            | recovery   | 0.90±0.26                 | 0.45±0.20  | 0.94±0.20               | 0.39±0.16  |
| $\Delta$ corrected<br>iC3b | $\Delta p$ | 0.07±0.15                 | -0.07±0.22 | 0.05±0.19               | -0.07±0.20 |
|                            | $\Delta r$ | 0.17±0.20                 | 0.02±0.20  | 0.30±0.20               | -0.09±0.14 |
| Corrected C4<br>(mg/dL)    | pre-test   | 9.72±5.76                 | 5.36±3.68  | 5.26±3.54               | 8.53±5.05  |
|                            | post-test  | 11.28±4.98                | 3.34±3.20  | 9.01±3.46               | 5.82±4.26  |
|                            | recovery   | 10.57±5.14                | 4.53±3.57  | 9.60±4.76               | 8.34±4.97  |
| $\Delta$ corrected<br>C4   | $\Delta p$ | 1.56±6.09                 | -2.03±1.55 | 3.75±2.59               | -2.71±2.16 |
|                            | $\Delta r$ | 0.85±6.22                 | -0.84±3.26 | 4.32±2.92               | -0.19±4.03 |

The table presents mean±SD of values corrected for plasma volume loss. Beep - maximal multistage 20m shuttle run test, RSA – reaped speed ability test.  $\Delta$  – the difference between results:  $\Delta p$  = post-test – pre-test,  $\Delta r$  = recovery – pre-test. The analyses were performed before (baseline, pre-test) and after the effort (5 minutes post-effort and during lactate recovery time about 1 hour after the test).

It must be pointed out that this form of non-normally distributed data presentation is not suggested as it may be misleading.
